# Doubled helix: Sagdoidea is the overlooked sister group of Helicoidea (Mollusca: Gastropoda: Pulmonata)

MAKIRI SEI<sup>1,2</sup>, DAVID G. ROBINSON<sup>1,3</sup>, ANTHONY J. GENEVA<sup>4</sup> and GARY ROSENBERG<sup>1\*</sup>

<sup>1</sup>Academy of Natural Sciences of Philadelphia, Drexel University, 1900 Benjamin Franklin Parkway, Philadelphia, PA 19103, USA

<sup>2</sup>Department of Biology, Arcadia University, 450 South Easton Road, Glenside, PA 19038, USA

<sup>3</sup>USDA APHIS National Malacology Laboratory, Academy of Natural Sciences of Philadelphia, 1900 Benjamin Franklin Parkway, Philadelphia, PA 19103, USA

<sup>4</sup>Department of Organismic and Evolutionary Biology, Harvard University, 26 Oxford Street, Cambridge, MA 02138, USA

Received 4 April 2017; revised 20 June 2017; accepted for publication 22 June 2017

We performed multi-locus, time-calibrated phylogenetic analyses of Jamaican Pleurodontidae to infer their relationships within pulmonate land snails. These analyses revealed that Sagdoidea, with about 200 species in the Caribbean Basin and neighbouring regions, is the sister group of Helicoidea with about 4700 species worldwide and that these superfamilies diverged 61–96 Ma. Morphological disparity in Sagdoidea is similar to that in Helicoidea despite its much lower species richness. Helicoidea originated in the New World and colonized the Old World 46–64 Ma. Pleurodontids and sagdids colonized Jamaica 15.0–18.4 and 12.8–16.5 Ma, respectively, consistent with geological estimates of Jamaican subaerial emergence by mid-Miocene. Allopatric convergence in shell morphologies required caution in using fossils from outside the geographic range of ingroup taxa to calibrate molecular clock estimates. Estimates of ages of clades varied by 24–55%, depending on the calibration points included. We use these results to revise Helicoidea and Sagdoidea. Pleurodontids from Jamaica and the Lesser Antilles were reciprocally monophyletic but other putative pleurodontids grouped basally in Helicoidea as Labyrinthidae (new family), or with Sagdidae. Newly recognized members of Sagdoidea are Solaropsinae and Caracolinae (Solaropsidae), Polydontinae (Sagdidae) and Zachrysiidae (new family). Pleurodontidae is restricted to two subfamilies, Pleurodontinae, in the Lesser Antilles, with Gonostomopsinae, a synonym, and Lucerninae resurrected for the Jamaican endemic genera *Lucerna*, *Dentellaria*, *Thelidomus* and *Eurycratera*. *Lucerna* and *Dentellaria* have been treated as subgenera of *Pleurodonte*, but rendered it paraphyletic in our analyses.

**ADDITIONAL KEYWORDS:** Caribbean – convergence – disparity – fossil calibration – Jamaica – phylogeny – Pleurodontidae – Sagdidae.

## INTRODUCTION

Interactions among phenotypic, functional, and lineage diversifications have long intrigued evolutionary biologists. Within Mollusca, the second largest metazoan phylum, of particular interest is determining the degree to which convergent shell morphologies are due to similar ecological opportunities, as seen in

adaptive radiation, or simply due to constraint in the range of possible shell morphologies (Hirano *et al.*, 2015; Stankowski, 2015). Unlike well-studied taxa, such in-depth evolutionary studies of land snails have been held back due to the lack of a robust phylogenetic framework. Many molluscan taxa are still defined by shell and anatomical characters, which may be under strong selective forces. For studies of phenotypic diversification (e.g. Triantis *et al.*, 2016) and biogeography (e.g. Scott, 1996), homoplasy mistaken for synapomorphy may obscure true patterns where classifications have not yet been corroborated with molecular data sets.

\*Corresponding author. E-mail: [rosenberg.ansp@drexel.edu](mailto:rosenberg.ansp@drexel.edu)  
[Version of Record, published online 23 September 2017; <http://zoobank.org/urn:lsid:zoobank.org:pub:2BDF2A2E-51BB-4265-AC64-EBD4DFB8CD04>]

Convergence in shell form has bedevilled the classification of the helicoid land snails for generations. Many of the species treated here were first named in the genus *Helix* Linnaeus, 1758, typified by *Helix pomatia* Linnaeus, 1758, the escargot, which has a shape many people associate with the prototypical 'garden snail'. Anatomical studies began in earnest with the work of Pilsbry (1895), who recognized multiple genera in the Helicidae, dividing them into the newly named subfamilies Polygyrinae, Acavinae, Sagdinae and Camaeninae, in addition to the non-typical Helicinae. Since then each of these subfamilies has been elevated to family level, and Acavoidea, Sagdoidea and, in some classification, Polygyroidea have been excluded from Helicoidea. Currently 17 families are recognized in Helicoidea but no consensus has been reached on their interrelationships (Bouchet *et al.*, 2005).

Our own interest in helicoid phylogeny began with an investigation of the Jamaican taxa within the Pleurodontidae Ihering, 1912. This family contains the largest endemic Jamaican snail species, with shells 20–70 mm in width, and crawling animals sometimes exceeding 100 mm in length. Since the outgroup of Pleurodontidae was unknown, we constructed a molecular phylogeny of Jamaican pleurodontid species using one nuclear and two mitochondrial genes, with multiple outgroups across and outside the helicoid families. The results proved to be of general interest for helicoid phylogeny, as they also shed light on previously hypothesized superfamilial relationships of many eupulmonate families (Table 1).

The West Indies has been an exceptionally fertile ground for investigating many aspects of biogeography and macroevolution (Ricklefs & Birmingham, 2008). Radiations of land snails in Jamaica are also of general interest as they represent natural experiments in which independent taxa evolving across the same landscape can be used to test many ideas in evolution and ecology. Jamaica has more than 560 named species of terrestrial gastropods, a remarkable diversity that for its area (11 000 km<sup>2</sup>) is as high as any place on earth (Rosenberg & Muratov, 2006). Overall 90% of Jamaican species are endemic and 97–100% of species in the eight most diverse families (25 or more species) are endemic: Helicinidae, Neocyclotidae, Annulariidae and Truncatellidae among the operculates, and Oleacinidae, Urocoptidae, Sagdidae and Pleurodontidae among the pulmonates. However, among terrestrial gastropods in the West Indies, to date, only Urocoptidae has been subjected to molecular phylogenetic analysis (Uit de Weerd, Robinson & Rosenberg, 2016).

Jamaica is thought never to have been in contact with another land mass since its emergence in the Miocene (Buskirk, 1985; Mitchell, 2008), so current diversity results from a limited, but unknown, number of colonization events and subsequent evolutionary radiations. Here, we test the hypothesis that Jamaican pleurodontids are monophyletic, representing a single colonization that resulted in four endemic genera: *Dentellaria* Schumacher, 1817, *Lucerna* Swainson, 1840, *Eurycratera* Beck, 1837 and *Thelidomus* Swainson, 1840. This hypothesis conflicts with the classifications by Cuzzo (2003), who grouped *Eurycratera* and *Thelidomus* with

**Table 1.** Comparison of superfamily-level classification by Zilch (1960), Tillier (1989), Bouchet *et al.* (2005) and Schileyko (1998, 2000, 2003, 2004, 2005, 2006)

| Family              | Zilch       | Tillier       | Bouchet & Rocroi | Schileyko       |
|---------------------|-------------|---------------|------------------|-----------------|
| Helicidae           | Helicea     | Helicoidea    | Helicoidea       | Helicoidea      |
| Hygromiidae*        | Helicea     | Helicoidea    | Helicoidea       | Hygromioidea    |
| Helicodontidae*     | Helicea     | Helicoidea    | Helicoidea       | Hygromioidea    |
| Geomitridae†        | Helicea     | Helicoidea    | Helicoidea       | Hygromioidea    |
| Cochlicellidae‡     | Helicea     | Helicoidea    | Helicoidea       | Xanthonychoidea |
| Sphincterochilidae* | Helicea     | Helicoidea    | Helicoidea       | Xanthonychoidea |
| Bradybaenidae       | Helicea     | Helicoidea    | Helicoidea       | Xanthonychoidea |
| Helminthoglyptidae  | Helicea     | Helicoidea    | Helicoidea       | Xanthonychoidea |
| Cepolidae§          | Helicea     | Helicoidea    | Helicoidea       | Xanthonychoidea |
| Camaenidae          | Camaenacea  | Helicoidea    | Helicoidea       | Camaenoidea     |
| Pleurodontidae      | Camaenacea  | Helicoidea    | Helicoidea       | Polygyroidea    |
| Polygyridae         | Polygyracea | Helicoidea    | Helicoidea       | Polygyroidea    |
| Sagdidae            | Polygyracea | Helicoidea    | Sagdoidea        | Sagdoidea       |
| Systrophiiidae      | Rhytidacea  | Endodontoidea | Rhytidoidea      | Rhytidoidea     |

\*Classified as Helicidae in Zilch (1960) and Tillier (1989).

†Classified as Helicidae in Zilch (1960) and Tillier (1989) and as a subfamily of Hygromiidae in Schileyko (2005).

‡Classified as Helicidae in Zilch (1960) and Tillier (1989) and as a tribe of Geomitridae in Razkin *et al.* (2015).

§Classified as a subfamily of Helminthoglyptidae in Zilch (1960), Tillier (1989) and Schileyko (2004).

*Polydontes* Montfort, 1810 rather than with *Pleurodonte* Fischer von Waldheim, 1807, and Schileyko (2006), who included both Jamaican and Lesser Antillean species in *Pleurodonte*. These classifications both imply at least two colonization events of Jamaica.

Previous classifications have generally agreed that *Lucerna* and *Dentellaria* are closely related to the Lesser Antillean *Pleurodonte*, sometimes being treated as subgenera within it (e.g. Baker, 1935). Since we end up concluding that *Lucerna* and *Dentellaria* should be ranked as full genera, independent of *Pleurodonte*, we treat them as full genera in the Results for simplicity and refer to *Pleurodonte* excluding *Lucerna* and *Dentellaria* as *Pleurodonte s.s.* for clarity. Placement of *Eurycratera* and *Thelidomus* has been more equivocal. Pilsbry (1895), Baker (1935), Zilch (1960) and Cuezco (2003) considered them more closely related to Greater Antillean *Polydontes* rather than Lesser Antillean *Pleurodonte*, while Wurtz (1955a) and Schileyko (2006) placed them with *Pleurodonte*. Both Pilsbry (1895) and Wurtz (1955a) noted the lack of characters to discern evolutionary relationships of the native Jamaican genera. Similarly, Cuezco's (2003) morphological cladistic analysis of Pleurodontidae (as American Camaenidae) did not find anatomical characters that unite Jamaican pleurodontid genera.

## MATERIAL AND METHODS

### TAXON SAMPLING

A total of 70 Jamaican pleurodontid specimens and 52 additional pleurodontid and helicoid specimens were used for molecular analysis (Table 2). These included the type species of each of the four Jamaican genera. Many nominal taxa have been treated as junior synonyms of *Lucerna lucerna* (Müller, 1774) (e.g. by Rosenberg & Muratov, 2006), which has been considered a morphologically variable species, or species complex, widespread in Jamaica (Goodfriend, 1983). After a preliminary analysis (Blake, 2007) revealed more than 10% genetic divergence in 16S sequences, we decided to include more than 20 operational taxonomic units (OTUs) from the *L. lucerna* species complex, since greater taxon sampling reduces errors in phylogenetic reconstruction (Zwickl & Hillis, 2002). Some OTUs could not be confidently identified with nominal taxa and so were identified as 'cf.' or assigned a letter (e.g. sp. A). Our sampling included 25 of 31 native pleurodontid taxa listed as valid by Rosenberg & Muratov (2006), four OTUs identified as 'cf.' and 19 identified by letter.

Non-Jamaican pleurodontids included the type species of *Caracolus* Montfort, 1810, *Coloniconcha* Pilsbry, 1933, *Gonostomopsis* Pilsbry, 1889, *Granodomus* Pilsbry, 1931, *Hispaniolana* Pilsbry, 1933, *Isomeria*

Albers, 1850, *Lissembryon* Pilsbry, 1933, *Luquillia* Crosse, 1892 and *Pleurodonte*. Non-type species of pleurodontid genera from outside Jamaica included *Labyrinthus quadridentatus*, *Parthena obliterated*, *Zachrysia provisoria* and *Z. havanensis*. The sampled pleurodontids included species from all of the Greater Antilles, the Lesser Antilles (*Gonostomopsis*, *Pleurodonte s.s.*), Central America (*Labyrinthus* Beck, 1837) and South America (*Isomeria* and *Solaropsis* Beck, 1837). Since the phylogenetic position of Jamaican pleurodontids is uncertain, we included members of 11 pulmonate families as immediate outgroups: Bradybaenidae, Camaenidae, Cepolidae, Helicidae, Helicodontidae, Helminthoglyptidae, Geomitridae, Hygromiidae, Polygyridae, Sagdidae and Sphincterochilidae, representing more than half of the families in superfamily Helicoidea Rafinesque, 1815. We used previously published sequences for 23 helicoid taxa in phylogenetic analyses from GenBank (Wade *et al.*, 2007; Uit de Weerd, 2008; Hugall & Stanisc, 2011; Table 2). *Tamayoa decolorata* (Drouët, 1859), a scolodontid in superfamily Rhytidoidea Pilsbry, 1893, was used as a non-helicoid outgroup. Wade, Mordan & Clarke (2001) identified *Haplotrema* Ancey, 1881, also a rhytidoid, to be a sister taxon to the Helicoidea.

To determine which putative pleurodontid and polygyrid fossils to include as calibration points, GR and MS visited the invertebrate paleontology collection at the United States National Museum. They examined type material of relevant taxa under a dissecting microscope and compared them with the recent members of Pleurodontidae, Polygyridae and other helicoids from the ANSP collection.

### DNA EXTRACTION, AMPLIFICATION AND SEQUENCING

We used DNeasy Tissue Kit (QIAGEN, Valencia, CA) to extract genomic DNA from individual snails preserved in 70% ethanol. A small piece of foot was used for most taxa. We sequenced two mitochondrial genes [cytochrome *c* oxidase subunit II (*COII*) and 16S *rRNA*] and one nuclear gene (28S *rRNA*). Polymerase chain reactions (PCRs) were performed using Apex Master Mix (Genesee Scientific, San Diego, CA) to amplify approximately 510 bp of *COII*, 440 bp of 16S and 425 bp of 28S. Primers and reaction conditions are indicated in Tables 3 and 4. Initially, PCR products were purified with ExoSAP-IT (USB, Cleveland, OH), sequenced with BigDye Terminator v3.1 Cycle Sequencing Kit, cleaned with BigDye Xterminator Purification Kit (Applied Biosystems, Carlsbad, CA) and sent for Sanger sequencing at University of Pennsylvania. Later, PCR products were purified and sequenced at Functional Biosciences, Inc. (Madison, WI). We were unable to amplify all genes

**Table 2.** List of specimens sequenced

| Taxon                                                   | Locality                                | Catalogue number | GenBank accession number |          |          |
|---------------------------------------------------------|-----------------------------------------|------------------|--------------------------|----------|----------|
|                                                         |                                         |                  | <i>COII</i>              | 16S      | 28S      |
| Helicoidea: Pleurodontidae: Lucerninae                  |                                         |                  |                          |          |          |
| <i>Dentellaria amabilis</i> (C. B. Adams, 1850)         | Trelawny Parish, Jamaica                | ANSP 448754      | KF246775                 | KF246883 | KF207604 |
| “                                                       | Trelawny Parish, Jamaica                | ANSP 449140      | KF246776                 | KF246884 |          |
| <i>Dentellaria atavus</i> (Pfeiffer, 1845)              | Westmoreland Parish, Jamaica            | ANSP 449145      | KF246777                 | KF246885 | KF207605 |
| <i>Dentellaria bronni</i> (Pfeiffer, 1846)              | Trelawny Parish, Jamaica                | ANSP 403293      | KF246778                 | KF246886 | KF207606 |
| <i>Dentellaria candescens</i> C. B. Adams, 1850         | Saint Ann Parish, Jamaica               | ANSP 448671      | KF246779                 | KF246887 | KF207607 |
| <i>Dentellaria invalida</i> (C. B. Adams, 1850)         | Saint Andrew Parish, Jamaica            | ANSP 402520      | KF246780                 | KF246888 | KF207608 |
| <i>Dentellaria okeniana</i> (Pfeiffer, 1845)            | Westmoreland Parish, Jamaica            | ANSP 448828      | KF246781                 | KF246889 | KF207609 |
| “                                                       | Westmoreland Parish, Jamaica            | ANSP 449163      | KF246782                 | KF246890 |          |
| “                                                       | Hanover Parish, Jamaica                 | ANSP 448749      | KF246783                 | KF246891 |          |
| <i>Dentellaria pallescens</i> (C. B. Adams, 1851)       | Trelawny Parish, Jamaica                | ANSP 448743      | KF246784                 | KF246892 | KF207610 |
| <i>Dentellaria peracutissima</i> (C. B. Adams, 1845)    | Manchester Parish, Jamaica              | ANSP 406240      | KF246785                 | KF246893 | KF207611 |
| “                                                       | Saint Catherine Parish, Jamaica         | ANSP 448684      | KF246786                 | KF246894 |          |
| <i>Dentellaria picturata</i> (C. B. Adams, 1849)        | Hanover Parish, Jamaica                 | ANSP 448691      | KF246787                 | KF246896 | KF207612 |
| <i>Dentellaria schroeteriana</i> (Pfeiffer, 1845)       | Hanover Parish, Jamaica                 | ANSP 449033      | KF246800                 | KF246909 | KF207621 |
| <i>Dentellaria simson</i> (Pfeiffer, 1852)              | Portland Parish, Jamaica                | ANSP 402407      | KF246789                 | KF246898 | KF207614 |
| “                                                       | Saint Catherine Parish, Jamaica         | ANSP 404204      | KF246790                 | KF246899 |          |
| “                                                       | Saint Andrew/Saint Mary Parish, Jamaica | ANSP 448967      | KF246791                 | KF246900 |          |
| <i>Dentellaria</i> cf. <i>D. simson</i>                 | Hanover Parish, Jamaica                 | ANSP 449274      | KF246792                 | KF246901 | KF207615 |
| <i>Dentellaria sinuata</i> (Müller, 1774)               | Westmoreland Parish, Jamaica            | ANSP 448876      | KF246793                 | KF246902 | KF207616 |
| “                                                       | Hanover Parish, Jamaica                 | ANSP 449001      | KF246794                 | KF246903 |          |
| <i>Dentellaria</i> cf. <i>D. sinuata</i> (Müller, 1774) | Saint Elizabeth Parish, Jamaica         | ANSP 405612      | KF246795                 | KF246904 | KF207617 |
| <i>Dentellaria sloaneana</i> (Pfeiffer, 1868)           | Portland Parish, Jamaica                | ANSP 402320      | KF246796                 | KF246906 | KF207619 |
| “                                                       | Hanover Parish, Jamaica                 | ANSP 448894      | KF246797                 | KF246907 |          |
| <i>Dentellaria strangulata</i> (C. B. Adams, 1849)      | Portland Parish, Jamaica                | ANSP 409730      | KF246798                 | KF246908 |          |
| “                                                       | Portland Parish, Jamaica                | ANSP 449377      | KF246799                 |          |          |



Table 2. Continued

| Taxon                                                    | Locality                        | Catalogue number | GenBank accession number |          |          |
|----------------------------------------------------------|---------------------------------|------------------|--------------------------|----------|----------|
|                                                          |                                 |                  | <i>COII</i>              | 16S      | 28S      |
| <i>Dentellaria tridentina</i> (Férussac, 1832)           | Westmoreland Parish, Jamaica    | ANSP<br>448960   | KF246801                 | KF246910 |          |
| "                                                        | Hanover Parish, Jamaica         | ANSP<br>448971   | KF246802                 | KF246911 |          |
| "                                                        | Westmoreland Parish, Jamaica    | ANSP<br>449292   | KF246803                 | KF246912 |          |
| "                                                        | Westmoreland Parish, Jamaica    | ANSP<br>449224   | KF246804                 | KF246913 |          |
| "                                                        | Hanover Parish, Jamaica         | ANSP<br>449172   | KF246805                 | KF246914 |          |
| <i>Dentellaria valida</i> (C. B. Adams, 1850)            | Saint Thomas Parish, Jamaica    | ANSP<br>402504   | KF246806                 | KF246915 | KF207622 |
| "                                                        | Portland Parish, Jamaica        | ANSP<br>448905   | KF246807                 | KF246916 |          |
| "                                                        | Saint Thomas Parish, Jamaica    | ANSP<br>449390   | KF246808                 | KF246917 |          |
| "                                                        | Saint Thomas Parish, Jamaica    | ANSP<br>449071   | KF246809                 | KF246918 |          |
| <i>Eurycratera jamaicensis</i> (Gmelin, 1791)            | Saint Ann Parish, Jamaica       | ANSP<br>450340   | KF246839                 | KF246951 | KF207652 |
| "                                                        | Hanover Parish, Jamaica         | ANSP<br>450059   | KF246840                 | KF246952 |          |
| <i>Lucerna bainbridgii</i> (Pfeiffer, 1845)              | Trelawny Parish, Jamaica        | ANSP<br>448881   | KF246811                 | KF246920 | KF207624 |
| "                                                        | Saint Elizabeth Parish, Jamaica | ANSP<br>449106   | KF246812                 | KF246921 |          |
| <i>Lucerna chemnitziana</i> (Pfeiffer, 1845)             | Portland Parish, Jamaica        | ANSP<br>409155   | KF246813                 | KF246922 | KF207625 |
| <i>Lucerna lamarckii</i> (Férussac, 1821)                | Saint Thomas Parish, Jamaica    | ANSP<br>409635   | KF246814                 | KF246923 | KF207626 |
| "                                                        | Portland Parish, Jamaica        | ANSP<br>409265   | KF246815                 | KF246924 |          |
| <i>Lucerna lucerna</i> (Müller, 1774)                    | Saint Ann Parish, Jamaica       | ANSP<br>451304   | KF246827                 | KF246938 | KF207639 |
| <i>Lucerna</i> cf. <i>L. lucerna</i> (Müller, 1774)      | Saint Andrew Parish, Jamaica    | ANSP<br>402237   | KF246816                 | KF246925 | KF207627 |
| <i>Lucerna mora</i> (Griffith & Pidgeon, 1834)           | Saint Andrew Parish, Jamaica    | ANSP<br>402247   |                          | KF246926 | KF207628 |
| "                                                        | Saint Thomas Parish, Jamaica    | ANSP<br>449273   | KF246817                 | KF246927 |          |
| <i>Lucerna sublucerna</i> (Pfeiffer, 1889)               | Saint Catherine Parish, Jamaica | ANSP<br>450319   | KF246838                 | KF246950 | KF207651 |
| <i>Lucerna</i> cf. <i>L. sublucerna</i> (Pfeiffer, 1889) | Saint Thomas Parish, Jamaica    | ANSP<br>449339   | KF246819                 | KF246929 | KF207630 |
| <i>Lucerna vacillans</i> (Vendryes, 1902)                | Saint Andrew Parish, Jamaica    | ANSP<br>402542   | KF246818                 | KF246928 | KF207629 |
| <i>Lucerna</i> sp. A                                     | Portland Parish, Jamaica        | ANSP<br>450022   |                          | KF246930 | KF207631 |
| <i>Lucerna</i> sp. B                                     | Clarendon Parish, Jamaica       | ANSP<br>450256   | KF246820                 | KF246931 | KF207632 |
| <i>Lucerna</i> sp. C                                     | Manchester Parish, Jamaica      | ANSP<br>450064   | KF246821                 | KF246932 | KF207633 |

**Table 2.** *Continued*

| Taxon                                                                           | Locality                        | Catalogue number | GenBank accession number |          |          |
|---------------------------------------------------------------------------------|---------------------------------|------------------|--------------------------|----------|----------|
|                                                                                 |                                 |                  | <i>COII</i>              | 16S      | 28S      |
| <i>Lucerna</i> sp. D                                                            | Saint Ann Parish, Jamaica       | ANSP<br>450271   | KF246822                 | KF246933 | KF207634 |
| <i>Lucerna</i> sp. E                                                            | Trelawny Parish, Jamaica        | ANSP<br>450219   | KF246823                 | KF246934 | KF207635 |
| <i>Lucerna</i> sp. F                                                            | Saint James Parish, Jamaica     | ANSP<br>450323   | KF246824                 | KF246935 | KF207636 |
| <i>Lucerna</i> sp. G                                                            | Saint James Parish, Jamaica     | ANSP<br>450279   | KF246825                 | KF246936 | KF207637 |
| <i>Lucerna</i> sp. H                                                            | Saint James Parish, Jamaica     | ANSP<br>450042   | KF246826                 | KF246937 | KF207638 |
| <i>Lucerna</i> sp. J                                                            | Saint Ann Parish, Jamaica       | ANSP<br>450039   | KF246828                 | KF246939 | KF207640 |
| <i>Lucerna</i> sp. K                                                            | Saint Ann Parish, Jamaica       | ANSP<br>449992   | KF246829                 | KF246940 | KF207641 |
| <i>Lucerna</i> sp. L                                                            | Saint Ann Parish, Jamaica       | ANSP<br>450157   | KF246830                 | KF246941 | KF207642 |
| <i>Lucerna</i> sp. M                                                            | Saint Ann Parish, Jamaica       | ANSP<br>450117   |                          | KF246942 | KF207643 |
| <i>Lucerna</i> sp. N                                                            | Saint Mary Parish, Jamaica      | ANSP<br>451076   | KF246831                 | KF246943 | KF207644 |
| <i>Lucerna</i> sp. O                                                            | Westmoreland Parish, Jamaica    | ANSP<br>451262   | KF246832                 | KF246944 | KF207645 |
| <i>Lucerna</i> sp. P                                                            | Westmoreland Parish, Jamaica    | ANSP<br>450246   | KF246833                 | KF246945 | KF207646 |
| <i>Lucerna</i> sp. Q                                                            | Hanover Parish, Jamaica         | ANSP<br>450109   | KF246834                 | KF246946 | KF207647 |
| <i>Lucerna</i> sp. R                                                            | Westmoreland Parish, Jamaica    | ANSP<br>450283   | KF246835                 | KF246947 | KF207648 |
| <i>Lucerna</i> sp. S                                                            | Hanover Parish, Jamaica         | ANSP<br>449988   | KF246836                 | KF246948 | KF207649 |
| <i>Lucerna</i> sp. T                                                            | Saint Elizabeth Parish, Jamaica | ANSP<br>450362   | KF246837                 | KF246949 | KF207650 |
| <i>Thelidomus aspera</i> (Férussac,<br>1821)                                    | Saint Elizabeth Parish, Jamaica | ANSP<br>407417   | KF246841                 | KF246953 | KF207653 |
| "                                                                               | Saint Catherine Parish, Jamaica | ANSP<br>405101   | KF246842                 | KF246954 |          |
| <i>Thelidomus cognata</i> (Férussac,<br>1821)                                   | Hanover Parish, Jamaica         | ANSP<br>450138   | KF246843                 | KF246955 | KF207654 |
| Helicoidea: Pleurodontidae: Pleurodontinae                                      |                                 |                  |                          |          |          |
| <i>Gonostomopsis auridens</i> (Rang,<br>1834)                                   | Martinique                      | USDA<br>131164   | KF246855                 | KF246969 | KF207670 |
| <i>Pleurodonte dentiens</i> (Férussac,<br>1822)                                 | St. Mark Parish, Dominica       | USDA<br>110730   | KF246844                 | KF246956 | KF207655 |
| <i>Pleurodonte guadeloupensis<br/>dominicana</i> (Pilsbry & Cockerell,<br>1937) | St. George Parish, Dominica     | USDA<br>110296   | KF246847                 | KF246959 | KF207658 |
| <i>Pleurodonte isabella</i> (Férussac,<br>1821)                                 | St. James Parish, Barbados      | USDA<br>131167   | KF246848                 | KF246960 | KF207659 |
| <i>Pleurodonte lychnuchus</i> (Müller,<br>1774)                                 | Basse-Terre, Guadeloupe         | USDA<br>131171   | KF246850                 | KF246963 | KF207663 |
| Helicoidea: Bradybaenidae                                                       |                                 |                  |                          |          |          |
| <i>Bradybaena similaris</i> (Férussac,<br>1822)                                 | Rio Grande do Sul, Brazil       | USDA<br>131199   |                          | KF247037 | KF207741 |

Table 2. Continued

| Taxon                                                  | Locality                       | Catalogue number | GenBank accession number |          |          |
|--------------------------------------------------------|--------------------------------|------------------|--------------------------|----------|----------|
|                                                        |                                |                  | <i>COII</i>              | 16S      | 28S      |
| “                                                      | Queensland, Australia          |                  | GQ851264                 | GQ851001 | AY014138 |
| Helicoidea: Camaenidae                                 |                                |                  |                          |          |          |
| <i>Austrochloritis agamemnon</i> (Gude, 1906)          | Queensland, Australia          |                  | GQ851314                 | GQ851060 | GQ850887 |
| <i>Austrochloritis porteri</i> (Cox, 1866)             | Queensland, Australia          |                  | GQ851256                 | GQ850994 | GQ850888 |
| <i>Basedowena gigantea</i> Solem, 1993                 | South Australia, Australia     |                  | GQ851260                 | GQ850998 | GQ850889 |
| <i>Chloritisanax banneri</i> (Pfeiffer, 1863)          | Queensland, Australia          |                  | GQ851266                 | GQ851003 | GQ850891 |
| <i>Cupedora lincolnensis</i> (Pfeiffer, 1864)          | South Australia, Australia     |                  |                          | GQ851157 |          |
| <i>Cupedora lorioliana</i> (Crosse, 1863)              | South Australia, Australia     |                  | GQ851323                 | GQ851070 |          |
| <i>Cupedora luteofusca</i> (Cox, 1868)                 | South Australia, Australia     |                  |                          | GQ851075 |          |
| <i>Cupedora patruelis</i> (Angas, 1868)                | South Australia, Australia     |                  |                          | GQ851069 |          |
| <i>Cupedora sublorioliana</i> (Pilsbry, 1890)          | South Australia, Australia     |                  |                          | GQ851217 |          |
| <i>Hadra barneyi</i> (Cox, 1873)                       | Queensland, Australia          |                  | GQ851308                 | GQ851047 | GQ850912 |
| <i>Jacksonena delicata</i> Hedley, 1912                | Queensland, Australia          |                  | GQ851398                 | GQ851229 | GQ850897 |
| <i>Mussonena campbelli</i> Iredale, 1938               | Queensland, Australia          |                  | GQ851287                 | GQ851025 | GQ850900 |
| <i>Noctepuna cerea</i> (Hedley, 1894)                  | Queensland, Australia          |                  | GQ851292                 | GQ851030 | GQ850901 |
| <i>Noctepuna mayana</i> (Hedley, 1899)                 | Queensland, Australia          |                  | GQ851293                 | GQ851031 | GQ850897 |
| <i>Obsteugenia inflecta</i> (Hedley, 1912)             | Queensland, Australia          |                  | GQ851339                 | GQ851091 | GQ850903 |
| <i>Papuexul bidwilli</i> (Reeve, 1853)                 | New South Wales, Australia     |                  | GQ851294                 | GQ851032 | GQ850905 |
| <i>Rhynchotrochus macgillivrayi</i> (Forbes, 1851)     | Queensland, Australia          |                  | GQ851298                 | GQ851036 | GQ850907 |
| <i>Satsuma jacobii</i> (Pilsbry, 1900)                 | Gifu, Japan                    |                  | GQ851277                 | GQ851015 | GQ850899 |
| <i>Spurlingia forsteriana</i> (Reeve, 1852)            | Queensland, Australia          |                  | GQ851350                 | GQ851105 | GQ850913 |
| <i>Sphaerospira fraseri</i> (Griffith & Pidgeon, 1833) | Queensland, Australia          |                  | GQ851300                 | AY151067 | GQ850908 |
| <i>Sphaerospira volgiola</i> (Iredale, 1933)           | Queensland, Australia          |                  | GQ851328                 | GQ851076 | GQ850894 |
| <i>Trozena morata</i> Iredale, 1938                    | Queensland, Australia          |                  | GQ851306                 | GQ851045 | GQ850911 |
| Helicoidea: Cepolidae                                  |                                |                  |                          |          |          |
| <i>Cepolis definita</i> (Fulton, 1908)                 | Pedernales, Dominican Republic | USDA<br>131190   |                          | KF247018 | KF207721 |
| <i>Dialeuca nemoraloides</i> (C. B. Adams, 1845)       | Saint Thomas Parish, Jamaica   | ANSP<br>451012   | KF246876                 | KF247020 | KF207723 |
| Helicoidea: Geomitridae                                |                                |                  |                          |          |          |
| <i>Cernuella cisalpina</i> (Rossmässler, 1837)         | North Carolina, USA            | USDA<br>142070   | KF246872                 | KF247012 | KF207715 |
| <i>Cochlicella acuta</i> (O. F. Müller, 1774)          | Nabeul, Tunisia                | USDA<br>131187   | KF246874                 | KF247015 | KF207718 |
| <i>Cochlicella barbara</i> (Linnaeus, 1758)            | Vizcaya, Spain                 | USDA<br>131188   | KF246875                 | KF247016 | KF207719 |
| <i>Disculella maderensis</i> (Wood, 1828)              | Madeira, Portugal              | USDA<br>131189   |                          | KF247017 | KF207720 |
| Helicoidea: Hygromiidae                                |                                |                  |                          |          |          |
| <i>Monacha cantiana</i> (Montagu, 1803)                | Italy                          | USDA<br>140816   | KF246873                 | KF247013 | KF207716 |

Table 2. Continued

| Taxon                                                  | Locality                          | Catalogue number | GenBank accession number |          |          |
|--------------------------------------------------------|-----------------------------------|------------------|--------------------------|----------|----------|
|                                                        |                                   |                  | <i>COII</i>              | 16S      | 28S      |
| <i>Trochulus hispidus</i> (Linnaeus, 1758)             | Maine, USA                        | USDA<br>131186   |                          | KF247014 | KF207717 |
| Helicoidea: Helicidae                                  |                                   |                  |                          |          |          |
| <i>Cornu aspersum</i> (O. F. Müller, 1774)             | Colorado, USA                     | USDA<br>131197   | KF246878                 | KF247035 | KF207739 |
| <i>Helix pomatia</i> Linnaeus, 1758                    | Ljubljana, Slovenia               | USDA<br>131198   |                          | KF247036 | KF207740 |
| <i>Cepaea nemoralis</i> (Linnaeus, 1758)               | Denmark                           | USDA<br>131204   | KF246877                 | KF247034 | KF207738 |
| Helicoidea: Helicodontidae                             |                                   |                  |                          |          |          |
| <i>Helicodonta obvoluta</i> (O. F. Müller, 1774)       | Italy                             | USDA<br>131202   |                          | KF247043 | KF207748 |
| Helicoidea: Helminthoglyptidae                         |                                   |                  |                          |          |          |
| <i>Plesarionta stearnsiana</i> (Gabb, 1867)            | California, USA                   | USDA<br>110439   |                          | KF247027 | KF207730 |
| Helicoidea: Labyrinthidae (new family)*                |                                   |                  |                          |          |          |
| <i>Isomeria oreas</i> (Koch, 1844)                     | Valle del Cauca, Colombia         |                  | KF246861                 | KF246980 | KF207682 |
| <i>Labyrinthus quadridentatus</i> (Broderip, 1832)     | Puntarenas, Costa Rica            |                  | KF246862                 | KF246981 | KF207683 |
| “                                                      | Puntarenas, Costa Rica            |                  | KF246863                 | KF246982 |          |
| Helicoidea: Polygyridae                                |                                   |                  |                          |          |          |
| <i>Polygyra cereolus</i> (Mühlfeld, 1816)              | Cayman Islands                    | USDA<br>131205   |                          | KF247038 | EU409912 |
| <i>Praticolella mexicana</i> Perez, 2011               | Westmoreland Parish, Jamaica      | ANSP<br>450907   | KF246879                 | KF247039 | KF207742 |
| Helicoidea: Sphincterochilidae                         |                                   |                  |                          |          |          |
| <i>Sphincterochila candidissima</i> (Draparnaud, 1801) | Spain                             | USDA<br>131200   |                          | KF247040 | KF207743 |
| Sagdoidea: Sagdidae: Platysuccineinae                  |                                   |                  |                          |          |          |
| <i>Platysuccinea</i> n. sp. (Shuttleworth, 1854)       | Ponce, Puerto Rico                | USDA<br>131185   |                          | KF247011 | KF207714 |
| Sagdoidea: Sagdidae: Polydontinae*                     |                                   |                  |                          |          |          |
| <i>Coloniconcha prima</i> Pilsbry, 1933                | Sud-Est, Haiti                    | UF 47737         | KF246859                 | KF246976 | KF207677 |
| <i>Granodomus lima</i> (Férussac, 1821)                | Trujillo Alto, Puerto Rico        | UF 28178         |                          | KF246977 | KF207678 |
| <i>Hispaniolana undulata</i> (Férussac, 1819)          | Grand-Anse, Haiti                 | UF 46656         |                          |          | KF207681 |
| <i>Lissembryon dilatata</i> (Pfeiffer, 1846)           | La Altagracia, Dominican Republic | UF 336785        | KF246864                 | KF246983 | KF207684 |
| <i>Luquillia luquillensis</i> (Shuttleworth, 1854)     | Rio Grande, Puerto Rico           | UF 191184        | KF246865                 | KF246984 | KF207685 |
| <i>Parthena obliterated</i> (Férussac, 1821)           | Sud, Haiti                        | UF 46184         | KF246866                 | KF246986 | KF207687 |
| “                                                      | Sud-Est, Haiti                    | UF 46592         | KF246867                 | KF246987 |          |
| Sagdoidea: Sagdidae: Sagdinae                          |                                   |                  |                          |          |          |
| <i>Aerotrochus mcNabianus</i> (Chitty, 1853)           | Hanover Parish, Jamaica           | ANSP<br>451227   |                          | KF246995 | KF207695 |
| <i>Corneosagda immunda</i> (C. B. Adams, 1849)         | Portland Parish, Jamaica          | ANSP<br>A22931   |                          | KF246996 | KF207696 |
| <i>Hyalosagda arboreoides</i> (C. B. Adams, 1845)      | Saint Thomas Parish, Jamaica      | ANSP<br>451023   |                          | KF246998 | KF207699 |



Table 2. Continued

| Taxon                                                     | Locality                          | Catalogue number | GenBank accession number |          |          |
|-----------------------------------------------------------|-----------------------------------|------------------|--------------------------|----------|----------|
|                                                           |                                   |                  | <i>COII</i>              | 16S      | 28S      |
| <i>Sagda</i> cf. <i>S. epistylloides</i> (Férussac, 1821) | Westmoreland Parish, Jamaica      | ANSP 451188      |                          | KF247005 | KF207708 |
| <i>Stauroglypta anthoniana</i> (C. B. Adams, 1849)        | Hanover Parish, Jamaica           | ANSP 450929      |                          | KF247006 | KF207709 |
| <i>Zaphysema olivaceum</i> H. B. Baker, 1935              | Portland Parish, Jamaica          | ANSP 409733      | KF246871                 | KF247010 | KF207713 |
| Sagdoidea: Solaropsidae: Caracolinae*                     |                                   |                  |                          |          |          |
| <i>Caracolus caracollus</i> (Linnaeus, 1758)              | Jayuya, Puerto Rico               | UF 133476        | KF246856                 | KF246970 | KF207671 |
| <i>Caracolus gaskoini</i> (Reeve, 1851)                   | Independencia, Dominican Republic | UF 257921        |                          | KF246971 | KF207672 |
| <i>Caracolus bornii</i> (Pfeiffer, 1846)                  | Trujillo Alto, Puerto Rico        | UF 28177         |                          | KF246972 | KF207673 |
| <i>Caracolus sagemon</i> (Beck, 1837)                     | Holguín, Cuba                     | UF 296189        | KF246857                 | KF246973 | KF207674 |
| "                                                         | Camagüey, Cuba                    | ANSP A22935      | KF246858                 | KF246974 | KF207675 |
| <i>Caracolus sarcocheila</i> (Mörch, 1850)                | La Altagracia, Dominican Republic | UF 22572         |                          | KF246975 | KF207676 |
| Sagdoidea: Solaropsidae: Solaropsinae                     |                                   |                  |                          |          |          |
| <i>Solaropsis</i> cf. <i>S. gibboni</i> (Pfeiffer, 1846)  | Cundinamarca, Colombia            |                  |                          | KF246988 | KF207688 |
| <i>Solaropsis heliaca</i> (d'Orbigny, 1835)               | Santa Cruz, Bolivia               | UF 212799        | KF246868                 | KF246989 | KF207689 |
| <i>Solaropsis</i> sp.                                     | El Zarza, Ecuador                 | UF 215393        | KF246869                 | KF246990 | KF207690 |
| <i>Solaropsis</i> sp.                                     | Concepción, Paraguay              |                  |                          | KF246991 | KF207691 |
| Sagdoidea: Zachrysiidae (new family)*                     |                                   |                  |                          |          |          |
| <i>Zachrysia havanensis</i> (Pilsbry, 1894)               | Mayagüez, Puerto Rico             | USDA 131181      |                          | KF246992 | KF207692 |
| <i>Zachrysia provisoria</i> (Pfeiffer, 1858)              | Grand Cayman, Cayman Islands      | ANSP 400324      | KF246870                 | KF246993 | KF207693 |
| Rhytidoidea: Scolodontidae                                |                                   |                  |                          |          |          |
| <i>Tamayoa decolorata</i> (Drouët, 1859)                  | Hanover Parish, Jamaica           | ANSP 451152      | KF246882                 | KF247045 | KF207750 |

The higher classification shown is what we have adopted as the result of the analyses.  
\*Clades formerly placed in Pleurodontidae.

for all specimens. After sequences from GenBank were added, the *COII* alignment consisted of 115 sequences, the 16S alignment consisted of 143 sequences and the 28S alignment consisted of 145 sequences. We deposited new sequences in GenBank under accession numbers KF207604–KF207750 and KF246775–KF247045 (Table 2).

#### PHYLOGENETIC RECONSTRUCTION

The rDNA sequences were aligned with MAFFT 6.822 (Katoh & Toh, 2008) as implemented on the CIPRES Portal v3.1 (Miller, Pfeiffer & Schwartz, 2010) and ClustalX 2.0.11 (Larkin *et al.*, 2007) using optimum gap opening and gap extension penalties for ribosomal DNA described in Wilm, Maintz & Steger (2006).

We then manually adjusted alignments further in MacClade 4.08 (Maddison & Maddison, 2005). We used ALISCOPE 2.0 (Misof & Misof, 2009; Kück *et al.*, 2010) to screen for randomly similar regions in aligned sequences on 16S. We used PartitionFinder v1.1.1 (Lanfear *et al.*, 2012) to determine that five partitions are the best fit for the data: the three codon positions of the *COII* gene, and the 16S and 28S genes. The best-fitting models of molecular evolution were determined using jModelTest 2.1.1 for each partition (Guindon & Gascuel, 2003; Darriba *et al.*, 2012) under the corrected Akaike Information Criterion (Akaike, 1974).

Maximum parsimony analysis was performed in PAUP\* 4.0b10 (Swofford, 2002) with equal weighting, using the heuristic search option of 1000 random addition sequences with tree bisection-reconnection

**Table 3.** Primers used in this study

| Gene            | Primer     | Sequence 5'–3'                  | Source                                    |
|-----------------|------------|---------------------------------|-------------------------------------------|
| <i>COII</i>     | LCOIIshort | ATG CTA TTT CAT GAY CAY GC      | Modified from Hugall <i>et al.</i> (2002) |
|                 | HCOIIshort | GCT CCG CAA ATC TCT GA          | Modified from Hugall <i>et al.</i> (2002) |
| 16S <i>rRNA</i> | 16Sa-L     | CGG CCG CCT GTT TAT CAA AAA CAT | Palumbi <i>et al.</i> (1991)              |
|                 | 16Sbr-H    | GGA GCT CCG GTT TGA ACT CAG ATC | Palumbi <i>et al.</i> (1991)              |
| 28S <i>rRNA</i> | D23F       | GAG AGT TCA AGA GTA CGT G       | Park & Ó Foighil (2000)                   |
|                 | D4R        | TGT TAG ACT CCT TGG TCC GTG T   | Park & Ó Foighil (2000)                   |

**Table 4.** Amplification conditions and temperature profiles

| Gene            | Primer pair             | Amplification conditions                                                                                                                                           | Temperature profile                                                                                                                                                                                                   |
|-----------------|-------------------------|--------------------------------------------------------------------------------------------------------------------------------------------------------------------|-----------------------------------------------------------------------------------------------------------------------------------------------------------------------------------------------------------------------|
| <i>COII</i>     | LCOIIshort & HCOIIshort | Total volume 20 µL with 1× Apex Master Mix*, 0.25 µM of each primer                                                                                                | 1 cycle of 4 min at 95 °C<br>13 cycles 1 min at 95 °C<br>30 s at 50 °C, decreasing by 1 °C every cycle<br>2 min at 72 °C<br>30 cycles 1 min at 95 °C<br>30 s at 38 °C<br>2 min at 72 °C<br>1 cycle of 10 min at 72 °C |
| 16S <i>rRNA</i> | 16Sa-L & 16Sbr-H        | Total volume 20 µL with 1× Apex Master Mix, 3.5 mM MgCl <sub>2</sub> , 0.4 mM BSA, 0.25 µM of each primer                                                          | 1 cycle of 2 min at 93 °C<br>40 cycles 45 s at 93 °C<br>1 min at 48 °C<br>1 min at 68 °C<br>1 cycle of 7 min at 68 °C                                                                                                 |
| 28S <i>rRNA</i> | D23F & D4R              | Total volume 20 µL with 1× Apex Master Mix, 0.25 µM of each primer<br>1.0 mM MgCl <sub>2</sub> , 0.4 mM BSA and 5% DMSO were added to amplify non-Jamaican samples | 1 cycle of 4 min at 95 °C<br>7 cycles 1 min at 95 °C<br>1 min at 60 °C, decreasing by 1 °C every cycle<br>90 s at 72 °C<br>30 cycles 1 min at 95 °C<br>1 min at 54 °C<br>90 s at 72 °C<br>1 cycle of 10 min at 72 °C  |

BSA, bovine serum albumin; DMSO, dimethyl sulfoxide.  
\*MgCl<sub>2</sub> (1.5 mM).

(TBR) branch-swapping and holding a maximum of 10 equally parsimonious trees at each step. Bootstrap frequencies were calculated based on 1000 replicates, each analyzed with a single random addition sequence and TBR swapping. Frequencies were calculated based on the strict consensus of all trees saved from each replicate, providing a conservative estimate of bootstrap support (Davis *et al.*, 2004).

We used RAxML v7.3.0 (Stamatakis, 2006) as implemented on the CIPRES Portal v3.1 to perform a maximum likelihood (ML) analysis. The data were partitioned into (1) *COII* first, (2) second, (3) third codon positions, (4) 16S and (5) 28S. The tree search and non-parametric bootstrap analysis were conducted simultaneously using 1000 replicates of the full bootstrap algorithm. During the tree search, the GTR + CAT

model with 25 rate categories was fitted to each data partition. Branch lengths and model parameters were then optimized on the ML tree identified under GTR + CAT using the GTR + G model (GTRMIX option). We created a bootstrap consensus tree in PAUP\* v4.0b (Swofford, 2002) and used Figtree v1.3.1 (Rambaut, 2009) to map an output tree file in vector graphics format.

We used MrBayes 3.1.2 (Huelsenbeck, Ronquist & Hall, 2001; Ronquist & Huelsenbeck, 2003) as implemented on the CIPRES Portal v3.1 to perform a Bayesian analysis. The data were partitioned as in the ML analysis. The analysis was performed by running two parallel analyses, consisting each of six Markov chains of 20 000 000 generations each with a sampling frequency of one tree per 1000 generations. The

number of swaps was set to one, and the chain temperature at 0.2. One different GTR + G model each with six substitution categories and a gamma-discrete category was applied for each partition. A consensus tree was calculated after omitting the first 5000 trees as burn-in. We evaluated the convergence of each analysis by examining the Potential Scale Reduction Factor and standard deviation (SD) of split frequencies in the standard output. We considered a clade to be moderately supported if it had bootstrap support values (B) between 75 and 89 and posterior probability (PP) between 0.95 and 0.97, and highly supported when  $B \geq 90$  and  $PP \geq 0.98$ .

#### DIVERGENCE TIME ANALYSIS

The combined partition set was used during BEAST v1.7.4 (Drummond *et al.*, 2012) analysis to estimate divergence times. We excluded the outgroup *Tamayo* following the recommendation in Drummond & Bouckaert (2015: 98) and redetermined the best substitution models for each gene with jModelTest v2.1.1 (TVM + G for *COII*, 010023 + G + F for 16S and 011230 + G + F for 28S) after the exclusion. We edited the Bayesian tree in Mesquite v2.75 (Maddison & Maddison, 2011) to create an ultrametric starting tree. We created the input file using BEAUti v1.7.4 (Drummond *et al.*, 2012), editing it to add the ultrametric starting tree and substitution models other than GTR. We modelled the gamma distribution with four categories and estimated base frequencies and used a relaxed molecular clock with rates for each branch drawn independently from a lognormal distribution (Drummond *et al.*, 2006). The tree model used a lognormal distribution for the Yule 'meanRate' prior (initial = 1.0).

Table 5 lists the calibration points used in the analysis. We chose the 'include stem' option for fossil-based calibration points so that the divergence time would be for the parent node of the most recent common ancestor (i.e. the bottom of the stem leading to the clade) except for the origin of *Lucerna* Clade B. The presence of two species at the Pliocene (*Lucerna bowdeniana* and *L. bernardi*) suggests that they belong to the crown group. For fossil-based calibration points, we chose a lognormal prior for the time to the most recent common ancestor ( $t_{MRC}$ ). The offsets of lognormal distributions were chosen as the younger bound of the fossils' ages. We used mean of 0.5 and SD of 1.0 for lognormal priors, except for the origin of *Labyrinthus s.l.*, for which the SD was set to 1.5 to account for the greater uncertainty of the age of *Labyrinthus obtusus* (Anderson & Hanna, 1925). We used normal distributions without hard bounds for geologic calibration points based on sub-aerial emergence of Jamaica and chose mean of 15 Ma

and SD of 1.0 Ma. Time of last emergence of Jamaica has been controversial, with estimates ranging from  $\leq 10$  Ma (Donovan, 2002; Graham, 2003) to 35 Ma (Iturralde-Vinent & MacPhee, 1999), with 10 Ma used to calibrate some phylogenies (e.g. Hedges, Coulloux & Vidal, 2009; Burbrink, Ruane & Pyron, 2012). A 10 Ma age is likely too young: a number of authors have indicated middle Miocene emergence (Steineck, 1974; Hendry, 1987; Donovan & Paul, 2013), which at latest would be 11.6 Ma. Uit de Weerd *et al.* (2016) used an earliest date of 16 Ma for Jamaican emergence for their biogeographical analysis of Urocoptidae. Some of the differences may stem from different readings of the same underlying sources. For example, Robinson (1971) said (p. 7), 'Although there may have been elevation of the northern part of Central Jamaica in the Early Miocene, the major part of the region was raised above sea level some 10 million years ago'. Mitchell *et al.* (2016) noted that the age of zircons reported by Comer, Naeser & McDowell (1980) from bauxite deposits overlying guano-derived phosphorites show that the Manchester and St. Ann Plateaus were subaerially exposed by mid-Miocene.

Because we were not confident about the taxonomic placement of the oldest fossils (see Discussion) and the timing of the last emergence of Jamaica, we performed four BEAST runs, combinations of with and without the Eocene calibration points and the Jamaican geologic calibration point. Each MCMC chain was run for 200 000 000 generations with convergence confirmed using Tracer v1.7.4 (Drummond *et al.*, 2012) when effective sample size reached 200 or more for all parameters. After discarding the first 10% of the states as a burn-in, the samples from the posterior were summarized using TreeAnnotator v1.7.4 (Drummond *et al.*, 2012), using a maximum clade credibility (MCC) tree, a PP limit of 0.5 and mean node height as settings. We used FigTree v1.3.1 (Rambaut, 2009) to visualize the output.

Acronyms: AMNH, American Museum of Natural History, New York; ANSP, Academy of Natural Sciences of Philadelphia, Drexel University, Philadelphia; BMNH, Natural History Museum, London; CAS, California Academy of Sciences, Geology type collection, San Francisco; HNC, Haus der Natur Cismar, Cismar, Germany; RMNH, Naturalis Biodiversity Center, Leiden; SDSNH, San Diego Natural History Museum, San Diego; SMF, Naturmuseum Senckenberg, Frankfurt am Main; TMM, Texas Memorial Museum, Austin; UF, University of Florida, Gainesville; USDA, United States Department of Agriculture, National Malacology Laboratory, Philadelphia; USNM, United States National Museum, Washington, D.C.; ZMUC, Zoological Museum, University of Copenhagen.

**Table 5.** Fossil-based calibration points for divergence analysis

| Calibration point                 | Basis                                                                                                                             | Locality and stratigraphic period                                                                                                     | Age (Ma)  | Used in all analyses? | Reference                                                     |
|-----------------------------------|-----------------------------------------------------------------------------------------------------------------------------------|---------------------------------------------------------------------------------------------------------------------------------------|-----------|-----------------------|---------------------------------------------------------------|
| Origin of <i>Pleurodonte</i> s.s. | <i>Pleurodonte lehneri</i> Jung, 1971; BMNH GG 4501                                                                               | Point St. Hilaire, Carriacou, Granada; Grand Bay Formation                                                                            | 16.0–11.6 | Yes                   | Jung (1971); Donovan <i>et al.</i> (2003)                     |
| Origin of Pleurodontidae          | <i>Pleurodonte wilsoni</i> Roth, 1984; TMM 40840–50                                                                               | Presidio County: Chalk Gap Draw, TX, USA. Upper part of Chambers Tuff, Vieja Group, Chadronian                                        | 37.8–36.7 | No                    | Roth (1984); Prothero (1996)                                  |
| Origin of <i>Lucerna</i> Clade B  | <i>Lucerna bowdeniana</i> (Simpson, 1895); MO115718, MO115719<br><i>Lucerna bernardi</i> (Kimball, 1947); 1947/1 Inst. Jam. Coll. | Bowden shell beds, St. Thomas Parish, Jamaica. Bowden Formation, Lower Coastal Group, the end of Zanclean - Piacenzian                | 3.8–2.7   | Yes                   | Goodfriend (1993); Aubry (1993)                               |
| Origin of <i>Labyrinthus</i> s.l. | <i>Labyrinthus obtusus</i> (Anderson & Hanna, 1925); CAS 1016                                                                     | Kern County: Live Oak Creek, CA, USA; Tejon Formation, Ypresian to Bartonian                                                          | 52.5–39.0 | No                    | Roth (1988); Niemi <i>et al.</i> (2013)                       |
| Origin of <i>Caracolus</i>        | <i>Caracolus aquilonaris</i> Bishop, 1979; AMNH 28814                                                                             | Sheridan County: about 3 miles south of White Clay, NE, USA; White River Group, Whitney Member, Brule Formation                       | 32.0–30.0 | No                    | Bishop (1979); Prothero & Emry (2004)                         |
| Origin of <i>Zachrysia</i>        | <i>Zachrysia fraternata</i> Roth, 1988; SDSNH 28388                                                                               | SDSNH 3278, Murphy Canyon Road, San Diego, CA, USA; transition between Friars and Scripps Formations, Late Bridgerian-Earliest Uintan | 47.2–45.2 | No                    | Roth (1988); Walsh, Prothero & Lundquist (1996); Alroy (2000) |
| Origin of Cepolidae               | <i>Polymita texana</i> Roth, 1984; TMM 40276-1                                                                                    | Presidio County: mouth of Capote Creek north of Candelaria, TX, USA; Colmena Tuff, Vieja Group, Chadronian                            | 41.2–37.8 | No                    | Roth (1984); Prothero (1996)                                  |
| Origin of Helminthoglyptidae      | <i>Xerarionta waltmilleri</i> Roth, 1984; TMM 40209-1006                                                                          | Presidio County: Reeves Bone Bed, 96 Ranch, TX, USA; upper part of Chambers Tuff, Vieja Group, Chadronian                             | 37.8–36.7 | No                    | Roth (1984); Prothero (1996)                                  |
| Origin of <i>Cupedora</i>         | <i>Cupedora lloydi</i> (McMichael, 1968)                                                                                          | 11 miles NE of Deep Well homestead, Northern Territory, Australia; Uta Limestone Formation                                            | 28.4–23.0 | Yes                   | Megirian <i>et al.</i> (2004); Schwartz (2006)                |
| Origin of <i>Cepaea</i>           | <i>Cepaea subglobosa</i> (Grateloup, 1828)                                                                                        | Larrey, Saucats, Gironde, France; Falun de Saucats Formation, Aquitanian                                                              | 23.0–20.4 | Yes                   | Lozouet, Lesport & Renard (2001); Cahuzac & Janssen (2010)    |
| Origin of Polygyrini              | <i>Linisa adammis</i> (Dall, 1890); USNM 111959                                                                                   | Ballast Point, Hillsborough County, FL, USA; Tampa Limestone Member; Arcadia Formation, Chattian                                      | 28.4–20.4 | Yes                   | Mansfield (1937); Scott <i>et al.</i> (2001)                  |

Catalog numbers and collection locality numbers are listed if available.



## RESULTS

Sequences were obtained for 79, 99 and 100% of the 122 individuals for *COII*, 16S and 28S gene fragments, respectively; some of these were reported by Blake (2007, unpublished thesis), who worked in our laboratory. The lengths of fragments are: *COII* gene: 484–505 bp, 16S gene: 412–476 bp, 28S gene: 416–429 bp. The best models of evolution for five partitions are shown in Table 6: the three codon positions in *COII* and two ribosomal subunit genes.

Because alignments by MAFFT and ClustalX resulted in identical topologies and near-identical bootstrap support values, we report results obtained from MAFFT-aligned data only. Incongruences in topology recovered with the three phylogenetic reconstruction methods were limited to poorly supported groups and outgroup taxa (Figs 1–3).

The three analyses did not recover Pleurodontidae as a monophyletic group because other helicoid families intervened. Figure 4 shows how the subfamilies of Pleurodontidae as defined by Schileyko (2006) are dispersed across the tree. Pleurodontidae s.s., which includes *Pleurodonte*, *Gonostomopsis* and Jamaican pleurodontids, formed a moderately or strongly supported clade with Bradybaenidae, Camaenidae, Cepolidae, Geomitridae, Helicidae, Helicodontidae, Helminthoglyptidae, Hygromiidae, Labyrinthidae, Polygyridae and Sphincterochilidae (maximum parsimony bootstrap [MPB] = 86; maximum likelihood bootstrap [MLB] = 97; posterior probability [PP] = 1). ML and Bayesian analyses recovered *Caracolus*, *Solaropsis*, *Zachrysia*, Sagdinae, Platysuccineinae Baker, 1940 and Polydontinae Schileyko, 2006 as a moderately to strongly supported monophyletic group (MLB/PP = 84/1). Jamaican sagdids, which belong to the subfamily Sagdinae, were strongly supported (MPB/MLB/PP = 100/99/1) as a clade, but *Platysuccinea* n. sp., the sole representative of the sagdid subfamily Platysuccineinae in this study, grouped with Polydontinae (MPB/MLB/PP = 77/79/1). Jamaican sagdids as a sister clade to Polydontinae + Platysuccineinae was moderately to

strongly supported (MPB/MLB/PP = 85/82/1). *Solaropsis* and *Caracolus* were recovered as a monophyletic group by ML and Bayesian analyses (MLB/PP = 76/1). Maximum parsimony analysis placed *Zachrysia* at the most basal position, while ML and Bayesian analyses weakly associated it with Solaropsidae (MLB/PP = 53/0.51).

All of the phylogenetic reconstruction methods recovered a single Jamaican pleurodontid clade (MPB/MLB/PP = 94/96/1), with *Thelidomus* and *Eurycratera* basal. The clade *Lucerna* + *Dentellaria* was moderately to strongly supported (MPB/MLB/PP = 87/94/1). Within *Lucerna*, the exclusively eastern clade (*Lucerna* Clade A: MPB/MLB/PP = 87/97/1) and other *Lucerna* except *L. bainbridgii* (*Lucerna* Clade B: MPB/MLB/PP = 94/99/1) were moderately to strongly supported. *Dentellaria* exclusive of *D. strangulata* and *D. okeniana* was strongly supported by ML and Bayesian analysis (MPB/MLB/PP = 55/89/1). *Dentellaria peracutissima* and *D. tridentina* were not recovered as monophyletic species. *Dentellaria candescens* and *D. simson*, which are treated as synonymous in Rosenberg & Muratov (2006) due to their morphologically similar apertural teeth, are not sister species. The relationships between *L. bainbridgii* with *Lucerna* Clades A and B are uncertain. It grouped with Clade A under ML and with Clade B under maximum parsimony and Bayesian analyses, but none gave robust support for the grouping (MPB/MLB/PP = 66/<50/0.68). Although relationships within *Dentellaria* are not well resolved, *Dentellaria* exclusive of *Lucerna* may not be monophyletic.

The sister clade of Jamaican Pleurodontidae was *Pleurodonte* s.s. + *Gonostomopsis*, both from the Lesser Antilles (MPB/MLB/PP = 100/99/1). *Pleurodonte* s.s. and *Gonostomopsis auridens* formed a monophyletic group (MPB/MLB/PP = 95/92/1). *Pleurodonte* s.s. had only weak support under maximum parsimony analysis (MPB = 65) and was paraphyletic under the other methods because of inclusion of *Gonostomopsis*. Blake (2007) also found a sister relationship between Jamaican and Lesser Antillean pleurodontids using a subset of the sequences reported here.

**Table 6.** The best models of evolution for each gene or partition as determined using the corrected Akaike Information Criterion Tests in jModelTest v2.1.1. (Darriba *et al.*, 2012; Guindon & Gascuel, 2003) including all the taxa listed in Table 2

|                                     | Model          | AICc     | $\alpha$ |
|-------------------------------------|----------------|----------|----------|
| <i>COII</i> , first codon position  | TrN + G        | 9039.16  | 0.35     |
| <i>COII</i> , second codon position | 010110 + G     | 3951.66  | 0.35     |
| <i>COII</i> , third codon position  | HKY + G        | 26308.13 | 1.82     |
| 16S                                 | HKY + G        | 32540.44 | 0.36     |
| 28S                                 | 011230 + G + F | 8950.17  | 0.43     |

G allows rate variation among sites, and F allows unequal base frequencies;  $\alpha$  is the shape parameter for the gamma distribution of rates among sites. The six-digit numerical code for a particular model (e.g. 012130) denotes the six substitution rate parameters.



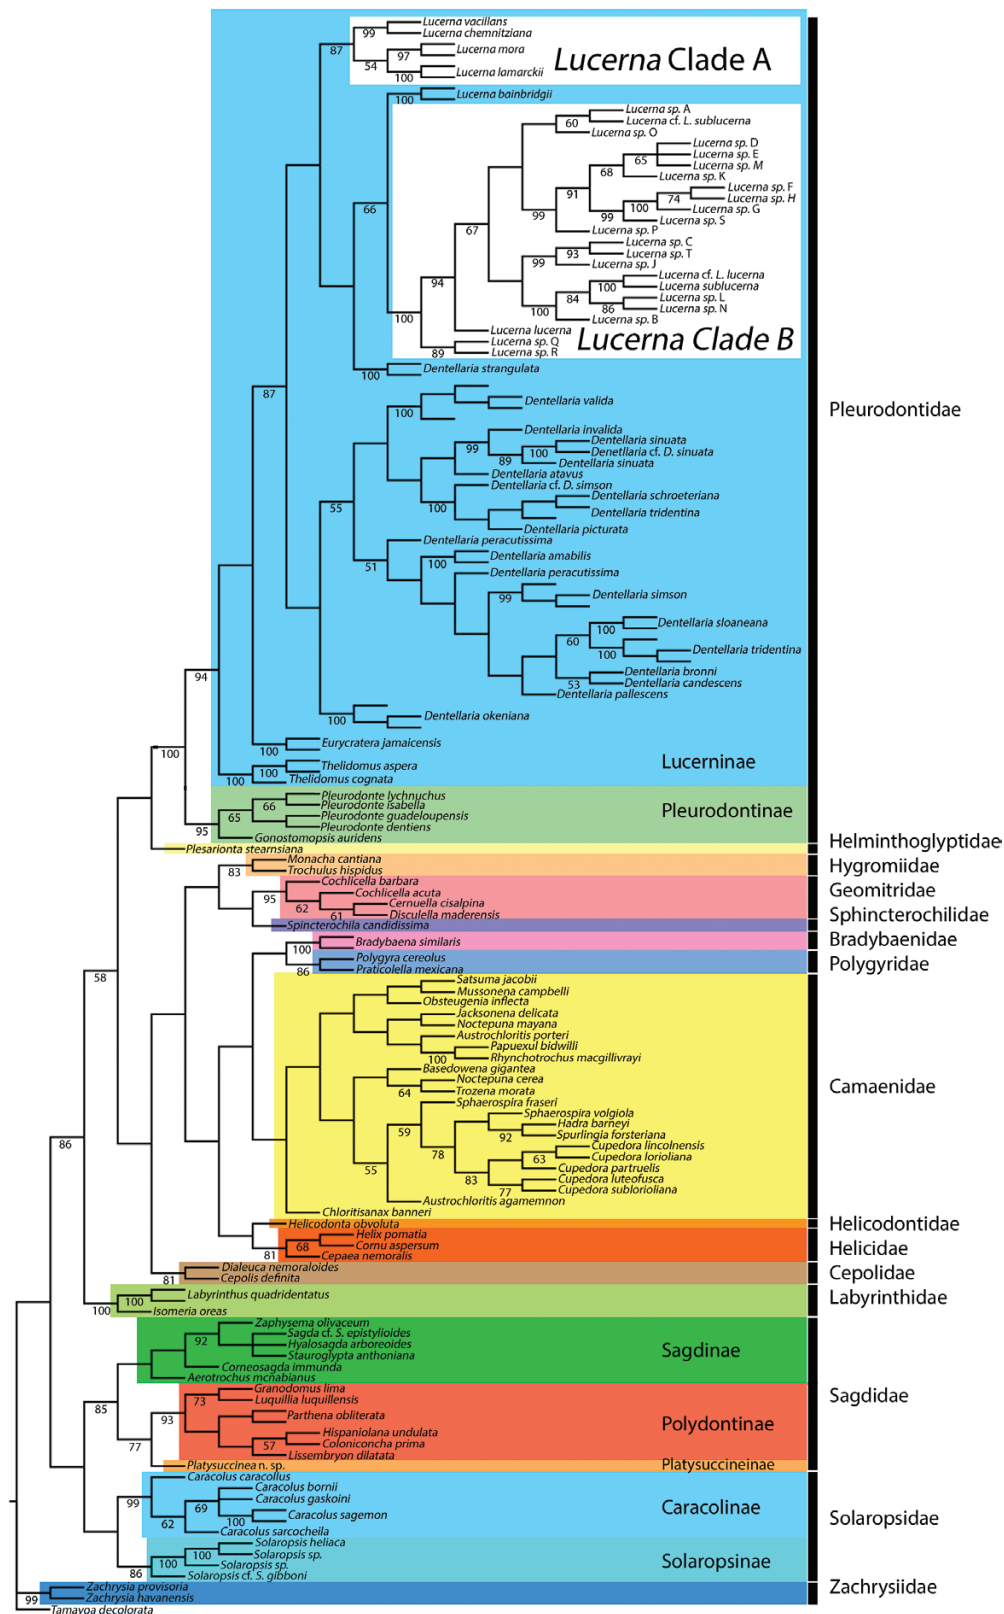

Downloaded from https://academic.oup.com/biolinnean/article/122/4/697/4210279 by guest on 20 April 2024

**Figure 1.** Majority rule consensus of the 14 most parsimonious trees (length = 9877 steps, consistency index = 0.19, retention index = 0.61) from the combined data. Bootstrap support values  $\geq 50\%$  are indicated below the branches.

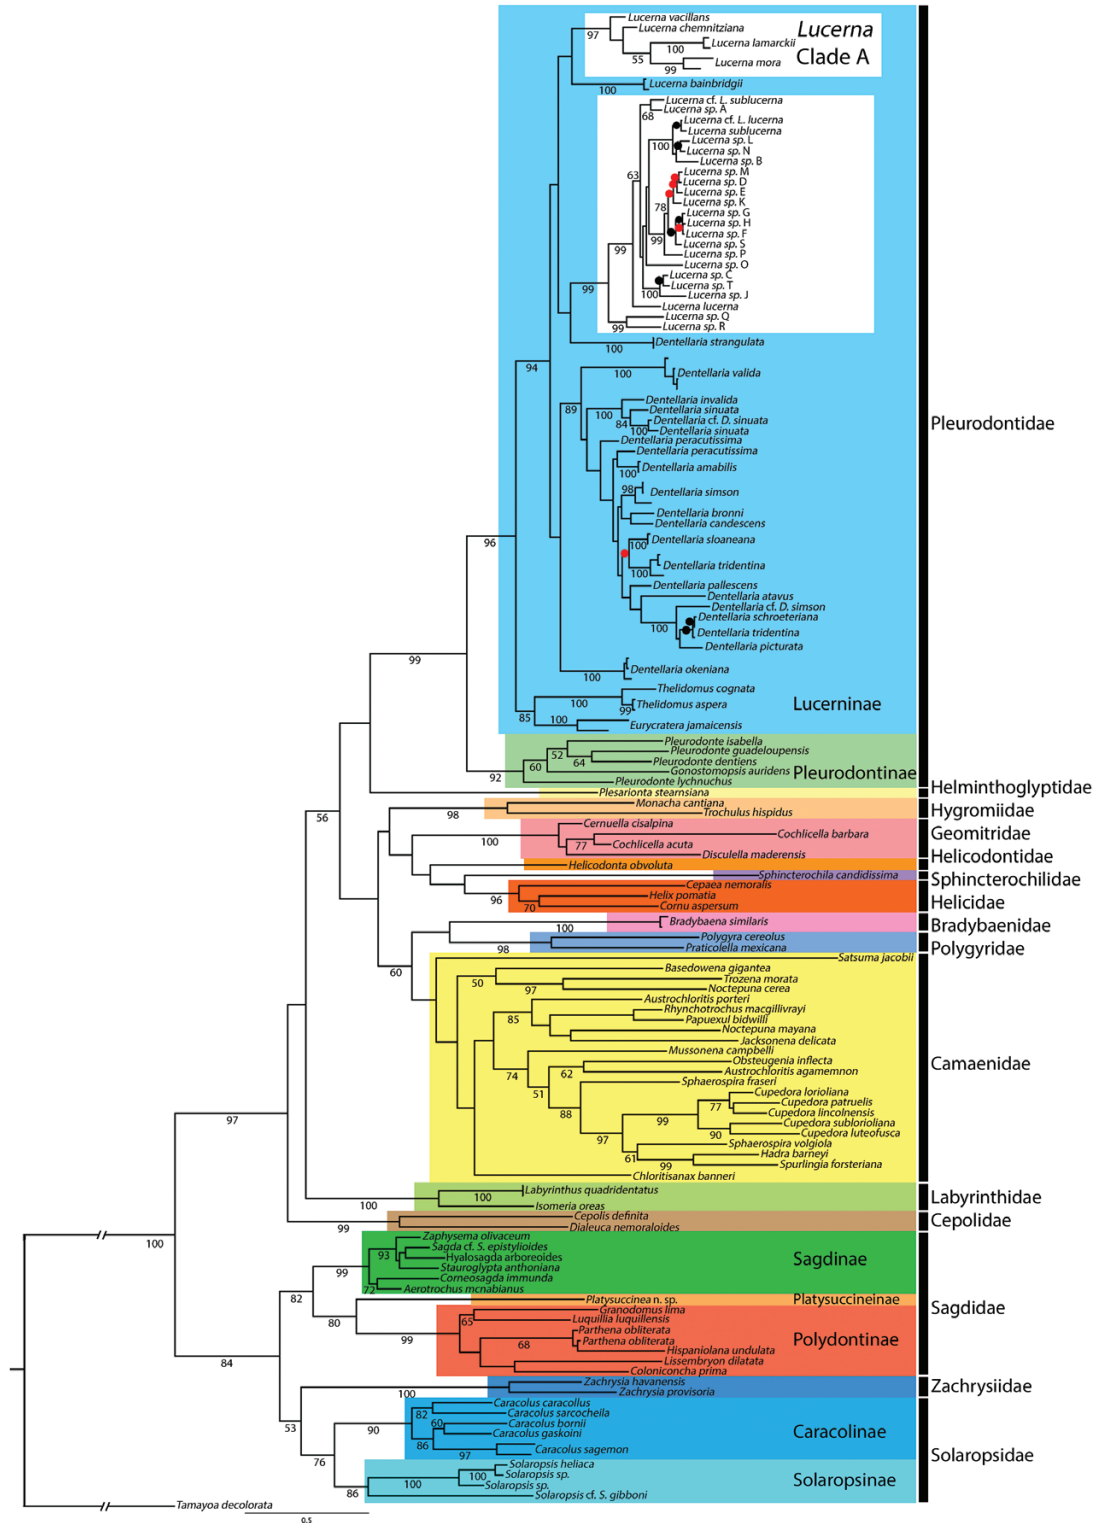

Downloaded from https://academic.oup.com/biolinnean/article/122/4/697/4210279 by guest on 20 April 2024

**Figure 2.** Maximum likelihood tree of species relationships based on the combined data, under the GTR + G evolutionary model fitted separately to each partition. Branch lengths are drawn proportional to the average probability of substitution per site under this model. Non-parametric bootstrap values  $\geq 50\%$  are indicated below or next to the branches. Where branch lengths are very short, bootstrap support is indicated with coloured dots (red: between 50 and 75%; blue: between 75 and 89%; black:  $\geq 90\%$ ). Scale bar in substitution/site.

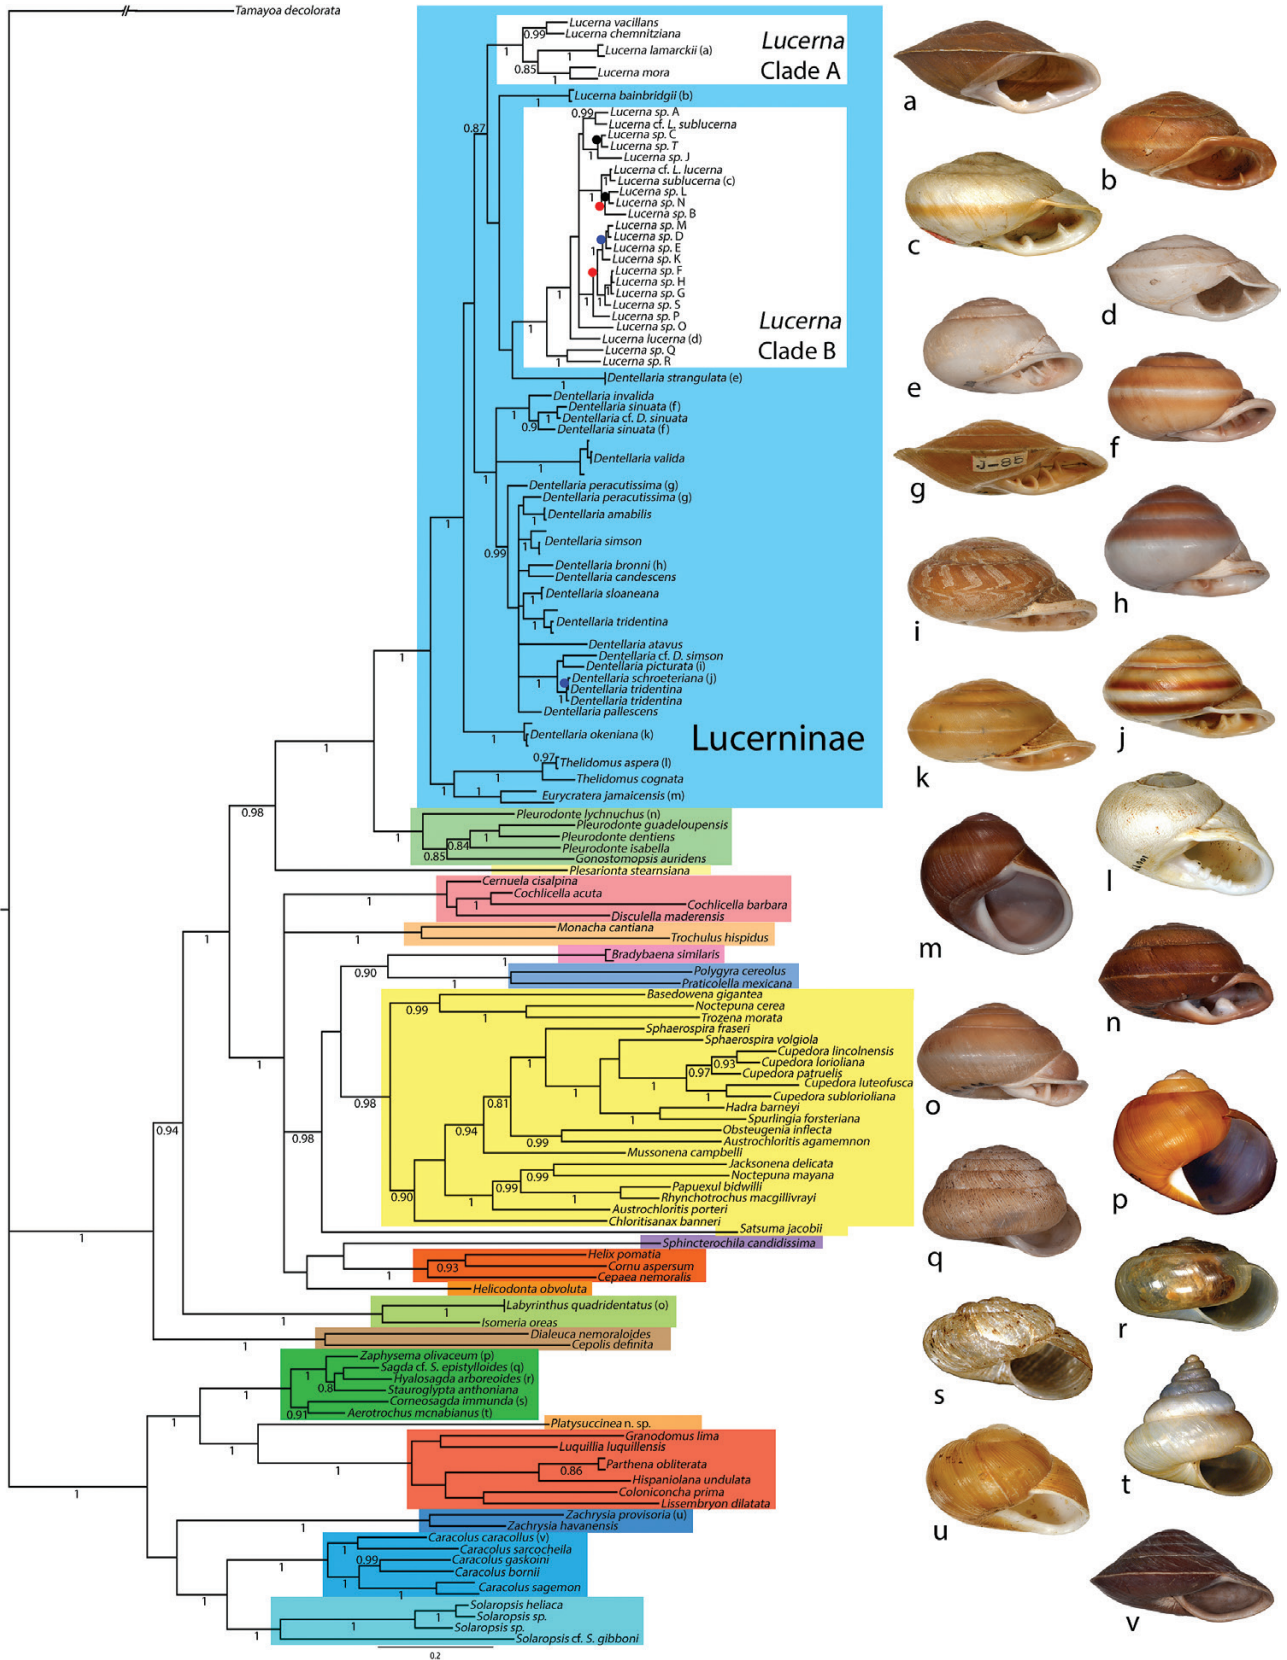

Downloaded from https://academic.oup.com/biolinnean/article/122/4/697/4210279 by guest on 20 April 2024



## EXAMINATION OF FOSSIL TAXA

Type material of the following fossil taxa was examined at USNM: *Helix adamnis* (USNM 111959), *H. crusta* (USNM 111946, 111948, 646926), *H. cunctator* (USNM 111947, 111949, 111950, 646255), *H. diespiter* (USNM 111951, 111952, 111953, 111954, 646927, 646928, 646929), *H. direpta* (USNM 111955, 111956, 130354), *H. haruspica* (USNM 111957, 165005), *H. instrumosa* (USNM 111945, 646253, 646254) and *H. latebrosa* (USNM 111944), all named by Dall (1890) from Ballast Point, Florida (Arcadia Formation); *Pleurodonte kendrickensis* Mansfield, 1937 (USNM 495996) also from the Arcadia Formation in Florida and *Pleurodonte bowdeniana* Simpson, 1895 (USNM 115718, 115719) from the Bowden Formation in Jamaica. Mansfield (1937) classified *H. adamnis* as *Polygyra* and *H. crusta*, *H. cunctator*, *H. diespiter*, *H. direpta*, *H. haruspica* and *H. instrumosa* as *Pleurodonte*.

Dall (1890) placed his *H. adamnis* in section *Daedalochila* of subgenus *Polygyra* (these are currently recognized as full genera) and compared it with the recent *Po. ventrosula* and *Po. hindsii*, which are currently classified as *Linisa* by Emberton (1995). Emberton (1995) tentatively referred *H. adamnis* to *Linisa* and Perez *et al.*'s (2014) phylogenetic reconstruction recovered a monophyletic clade containing *Daedalochila*, *Polygyra* and *Linisa*, so it is reasonable to calibrate the branch representing Polygyrini (*Polygyra cereolus*) with this fossil.

Our examination of *H. crusta*, *H. cunctator*, *H. diespiter*, *H. direpta*, *H. instrumosa* and *H. latebrosa* shows that they possess apertural characters like those of some polygyrids and cepolids, namely a ridge behind the adult aperture formed by the lip turning in to constrict the aperture and then reflecting back out, with thickening of the inner shell layer along the ridge, but no thickening of the outer shell layer at the outer lip itself. In the Jamaican pleurodontids, the outer lip flares at maturity and thickens so that both inner and outer shell layers are involved in the thickening and the thickening does not constrict the aperture. In *Pleurodonte s.s.*, the outer lip may or may not flare at

maturity, but thickening involves both inner and outer shell layers, in some cases constricting the aperture. This constriction, however, is not homologous to that seen in the Floridian fossils and occurs at the growing edge of the outer lip, rather than on an internal ridge behind it. *Helix haruspica* and *Pl. kendrickensis* do not have the internal ridge, but thickening of the lip involves only the inner shell layer; also, they lack the pustulate microsculpture of pleurodontids.

Our examination of *Pl. bowdeniana* confirmed that it is a pleurodontid; it has thickening of the outer lip involving both internal and external shell layers, and it has pustulate microsculpture, as shown by Goodfriend (1993: fig. 1D). Goodfriend referred *Pl. bowdeniana* to the *Pleurodonte lucerna* species-group, and we concur with that placement. Goodfriend also referred *Pl. bernardi* to that species group although it has four apertural teeth, which is more characteristic of *Dentellaria* species; however, it lacks the basal grooves leading to the teeth, so we accept Goodfriend's placement. These taxa were used to calibrate the node for *Lucerna* Clade B, which corresponds to the *Pl. lucerna* species-group. No other calibrations were used within *Pleurodonte* as we could not confirm any of the Floridian fossils referred to *Pleurodonte* as members of the clade.

## DIVERGENCE TIME ANALYSIS

Because we have reservations about the validity of calibration points in the Eocene (see Discussion), we report the divergence dates estimated without them (Fig. 4). See Table 7 for the comparison of divergence dates estimated with and without the Eocene fossils and with and without the last emergence of Jamaica. Divergence time estimates based on our molecular data (Fig. 4; Table 7), when calibrated with the age of the last emergence of Jamaica, place the origin of Jamaican Pleurodontidae (i.e. Lucerninae; Node H) at approximately 16.7 Ma [ $t_{MRCA}$ ; 95% posterior credibility interval (PCI): 15.0–18.4 Ma]. Jamaican Sagdidae

**Figure 3.** Best Bayesian tree of species relationships based on the combined data. Branch lengths are drawn proportional to the average probability of substitution per site under the evolutionary model fitted separately to each partition. Posterior probabilities >0.8 are indicated below or next to the branches. Where branch lengths are very short, bootstrap support is indicated with coloured dots (red: between 0.8 and 0.94; blue: between 0.95 and 0.97; black:  $\geq 0.98$ ). Scale bar in substitution/site. The specimens figured are not the individuals sequenced, and the figures are not to scale. Taxa shown to the right: (a) *Lucerna lamarckii* (ANSP 162727, standard diameter: 61.6 mm), (b) *Lu. bainbridgii* (ANSP 162738, 55.7 mm), (c) *Lu. subluccerna* (ANSP 4295, 34.0 mm), (d) *L. lucerna* (ZMUC-GAS-556, 31.9 mm), (e) *Dentellaria strangulata* (ANSP 766, 26.2 mm), (f) *D. sinuata* (ANSP 1289, 26.2 mm), (g) *D. peracutissima* (ANSP 162697, 42.2 mm), (h) *D. bronni* (ANSP 770, 23.1 mm), (i) *D. picturata* (ANSP 8961, 26.7 mm), (j) *D. schroeteriana* (ANSP 782, 26.2 mm), (k) *D. okeniana* (ANSP 159730, 34.8 mm), (l) *Thelidomus aspera* (ANSP 100737, 47.0 mm), (m) *Eurycratera jamaicensis* (ANSP 162171, 49.6 mm), (n) *Pleurodonte lychnuchus* (ANSP 1006, 26.3 mm), (o) *Labyrinthus quadridentatus* (ANSP 45553, 20.6 mm), (p) *Zaphysema olivaceum* (ANSP 165680, 25.5 mm), (q) *Sagda cf. S. epistylioides* (ANSP 461700, 11.6 mm), (r) *Hyalosagda arboreoides* (ANSP 28244, 12.0 mm), (s) *Corneosagda immunda* (ANSP 168487, 11.6 mm), (t) *Aerotrochus mcNabianus* (ANSP 868, 9.0 mm), (u) *Zachrysis provisorica* (ANSP 451224, 29.7 mm), (v) *Caracolus caracollus* (ANSP 337205, 60.8 mm).

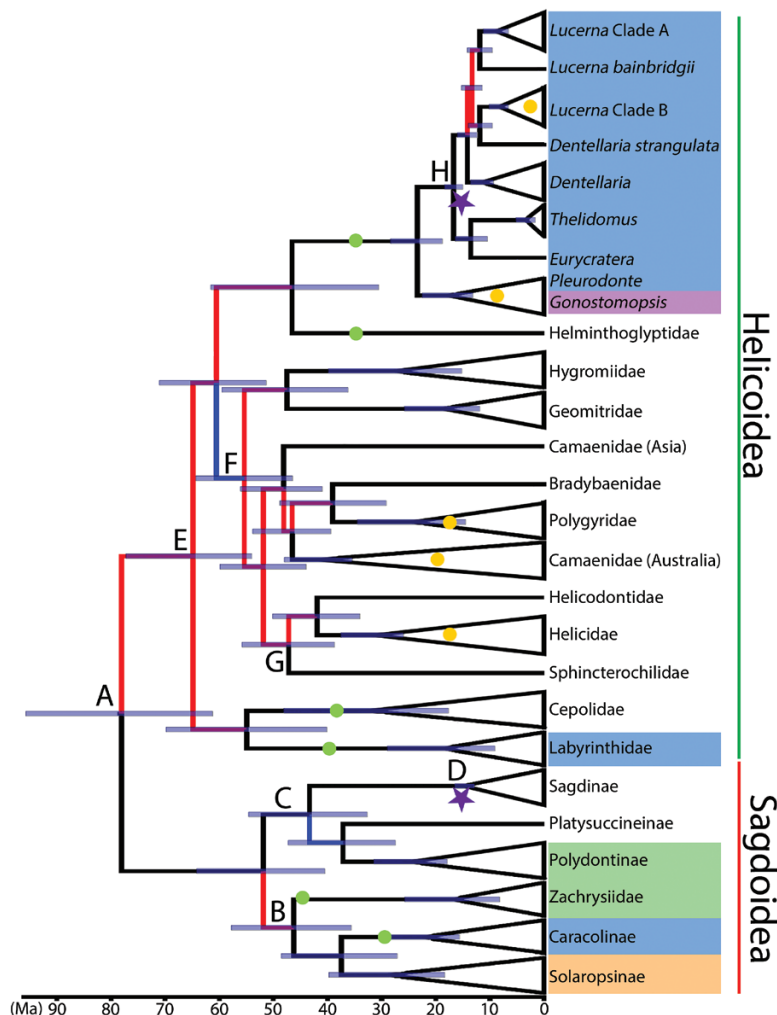

**Figure 4.** Maximum Clade Credibility (MCC) chronogram inferred using the non-autocorrelated model of rate evolution in BEAST and without the Eocene calibration points (see Table 5). Error bars (blue) represent 95% posterior credibility intervals and are only given for nodes that were present on more than 50% of the posterior sampled trees. The colour of branches indicates Bayesian posterior probabilities shown as black >0.98, blue 0.95–0.98, red <0.95. Subfamilies of Pleurodontidae in Schileyko (2006) are highlighted: Pleurodontinae: blue, Polydontinae: green, Gonostomopsinae: purple. Solaropsinae, shown in orange, was classified as a subfamily of Polygyridae in Schileyko (2006). Yellow dots indicate the minimum ages of fossils used as calibration points younger than the Eocene. Green dots indicate the minimum ages of fossils in the Eocene. Purple stars indicate the mean of the prior based on the last emergence of Jamaica.

might have arisen slightly later (Node D,  $t_{MRCA}$  14.7 Ma, PCI: 12.8–16.5 Ma). The split of Helicoidea and Sagdoidea is estimated to have occurred at 78.1 Ma (Node A, PCI: 61.2–95.7 Ma), between late Cretaceous and middle Paleocene. The diversification of Helicoidea is estimated to have occurred around 64.9 Ma (Node E, PCI: 54.0–77.3 Ma), between late Cretaceous and early Eocene. Exclusion of the calibration points based on the Eocene fossils resulted in generally older estimates across the MCC tree, and the oldest estimates were consistently found when both the Eocene and Jamaican emergence calibration

points were excluded (Table 7). Depending on what calibration points were included, estimated mean ages of nodes varied by 24% [Node B, min. 47.6 Ma (the Eocene calibration points included and the Jamaican geologic calibration points excluded), max. 58.8 Ma (both the Eocene and Jamaican geologic calibration points excluded)] to 55% [Node H, min. 16.5 Ma (both the Eocene and Jamaican geologic calibration points included), max. 25.5 Ma (both the Eocene and Jamaican geologic calibration points excluded)]. The differences between replicated BEAST runs were negligible.



**Table 7.** The comparison of posterior probabilities and the divergence date estimates for the major clades estimated with and without the calibration points in the Eocene and the last emergence of Jamaica (Table 5)

| Node                                                                  | Eocene fossils included |                   |                 |                   | Eocene fossils excluded |                   |                 |                    |
|-----------------------------------------------------------------------|-------------------------|-------------------|-----------------|-------------------|-------------------------|-------------------|-----------------|--------------------|
|                                                                       | With Jamaica            |                   | Without Jamaica |                   | With Jamaica            |                   | Without Jamaica |                    |
|                                                                       | PP                      | Mean (95% PCI)    | PP              | Mean (95% PCI)    | PP                      | Mean (95% PCI)    | PP              | Mean (95% PCI)     |
| A. Helicoidea/Sagdoidea split                                         | 1.0                     | 75.4 (63.2, 89.9) | 0.99            | 78.3 (65.2, 94.6) | 1.0                     | 78.1 (61.2, 95.7) | 1.0             | 98.3 (74.0, 124.0) |
| B. Zachrysiidae/Solaropsidae split                                    | 0.74                    | 47.7 (45.9, 50.1) | 0.82            | 47.6 (46.0, 50.4) | 0.68                    | 51.8 (40.5, 64.2) | 0.7             | 58.8 (42.9, 75.6)  |
| C. Sagdinae/Polydontinae + Platysuccineinae split                     | 1.0                     | 43.9 (35.8, 51.8) | 1.0             | 45.2 (37.2, 53.9) | 1.0                     | 43.3 (32.6, 54.6) | 1.0             | 55.4 (40.2, 71.5)  |
| D. Diversification of Sagdinae                                        | 1.0                     | 14.6 (12.7, 16.4) | 1.0             | 13.2 (8.7, 18.6)  | 1.0                     | 14.7 (12.8, 16.5) | 1.0             | 16.4 (10.5, 23.2)  |
| E. Diversification of Helicoidea                                      | 1.0                     | 57.9 (50.0, 66.0) | 0.99            | 60.7 (52.5, 70.5) | 0.90                    | 64.9 (54.0, 77.3) | 0.95            | 80.2 (63.4, 99.4)  |
| F. Diversification of Old World helicoids                             | 0.73                    | 52.5 (44.6, 60.4) | 0.7             | 55.1 (46.5, 64.5) | 0.96                    | 55.4 (46.5, 64.4) | 0.98            | 67.6 (53.5, 81.6)  |
| G. Diversification of Sphincterochilidae + Helicodontidae + Helicidae | 0.84                    | 45.6 (37.3, 53.6) | 0.76            | 48.0 (39.7, 57.0) | 0.77                    | 47.2 (38.7, 55.8) | 0.77            | 56.9 (44.1, 69.9)  |
| H. Diversification of Lucerninae                                      | 1.0                     | 16.5 (14.9, 18.2) | 1.0             | 20.7 (17.1, 25.2) | 1.0                     | 16.7 (15.0, 18.4) | 1.0             | 25.5 (19.1, 32.1)  |

Mean ages and 95% posterior credibility intervals are shown in Ma.

## DISCUSSION

### PHYLOGENETIC RELATIONSHIPS AND CLASSIFICATION OF HELICOIDEA AND SAGDOIDEA

Our molecular phylogeny revealed that many taxa previously classified as pleurodontids grouped with Sagdidae. Sagdidae has been considered anatomically distinct from helicoids and classified as a divergent taxon (see Table 1) with rank as high as infraorder (Sagdoinei Schileyko & Starobogatov, in Golikov & Starobogatov, 1989). We found that most supposed pleurodontids do not group with *Pleurodonte*, but with Sagdidae, including all members of Polydontinae in the classification of Schileyko (2006), and many taxa placed in Caracolinae by Cuzzo (2003) (see Table 8) including *Solaropsis*. Based on molecular evidence, Wade, Mordan & Naggs (2006) and Wade *et al.* (2007) found that Pleurodontidae was not monophyletic, with '*Pleurodonte*' (corresponding to *Dentellaria* herein) and *Thelidomus* grouping with Hygromiidae, and '*Polydonte*' (corresponding to *Granodomus* and *Hispaniolana* herein) and *Zachrysia* grouping with Sagdidae. Our results support and amplify this finding (Figs 1–4) and provide further confirmation that the Camaenidae should be restricted to the Old World, contrary to Cuzzo (2003), but in agreement with Scott (1996) and Wade *et al.* (2006, 2007), who found

paraphyly of the Old and New World taxa. Although we used relatively short fragments of one nuclear and two mitochondrial genes, our results are concordant with prior molecular results where there is taxonomic overlap, and we found robust support for major clades (e.g. Helicoidea, Sagdoidea, Pleurodontidae). A preliminary phylogeny of Helicoidea and Sagdoidea based on 58 exon loci (ca. 20 kbp total) by Sei *et al.* (2014) following the methodology in Teasdale *et al.* (2016) also recovered a similar overall topology, but with much less extensive taxon sampling.

Sagdoidea as previously constituted contained mainly small-bodied taxa. Of 21 genera treated by Schileyko (1998), only two have any species in which maximum shell dimension exceeds 20 mm (*Zaphysema* Pilsbry, 1894 and *Sagda* Beck, 1837), yet all the taxa that we found to group with Sagdidae have members with maximum shell dimension greater than 25 mm (Polydontinae, *Caracolus*, *Solaropsis*, *Zachrysia*). Sagdinae in Sagdoidea thus seems analogous to Hygromiidae and Geomitridae in Helicoidea as a radiation exploiting small body size. Platysuccineinae and two other subfamilies of Sagdidae, Aquebaninae Baker, 1940 and Yunqueinae Baker, 1961, which are not represented in our analyses, also have small body size.

In addition to high levels of divergence in anatomy and shell morphology obscuring relationships,

**Table 8.** Classification of New World Pleurodontidae by Zilch (1960), Cuzzo (2003) and Schileyko (2006)

| Zilch (1960)             | Cuzzo (2003)            | Schileyko (2006)       |
|--------------------------|-------------------------|------------------------|
| Camaenidae               | Camaenidae              | Pleurodontidae         |
| <i>Pleurodonte</i>       | Pleurodontinae          | Pleurodontinae         |
| ( <i>Pleurodonte</i> )   | <i>Pleurodonte</i>      | <i>Pleurodonte</i>     |
| ( <i>Dentellaria</i> )   | ( <i>Pleurodonte</i> )  | <i>Dentellaria</i>     |
|                          | ( <i>Dentellaria</i> )  |                        |
|                          | Caracolinae             |                        |
| ( <i>Caracolus</i> )     | <i>Caracolus</i>        | <i>Caracolus</i>       |
| ( <i>Gonostomopsis</i> ) | –                       | *                      |
| <i>Labyrinthus</i>       |                         | <i>Labyrinthus</i>     |
| ( <i>Labyrinthus</i> )   | <i>Labyrinthus</i>      | ( <i>Labyrinthus</i> ) |
| ( <i>Isomeria</i> )      | <i>Isomeria</i>         | ( <i>Isomeria</i> )    |
| <i>Eurycratera</i>       |                         |                        |
| ( <i>Eurycratera</i> )   | <i>Eurycratera</i>      | <i>Eurycratera</i>     |
| ( <i>Thelidomus</i> )    | <i>Thelidomus</i>       | <i>Thelidomus</i>      |
|                          |                         | Polydontinae           |
|                          | <i>Polydotes</i>        | <i>Polydotes</i>       |
| ( <i>Granodomus</i> )    | ( <i>Granodomus</i> )   | <i>Granodomus</i>      |
| ( <i>Parthena</i> )      | ( <i>Parthena</i> )     | <i>Parthena</i>        |
| <i>Polydotes</i>         |                         |                        |
| ( <i>Polydotes</i> )     | ( <i>Polydotes</i> )    |                        |
| ( <i>Luquillia</i> )     | ( <i>Luquillia</i> )    | <i>Luquillia</i>       |
| ( <i>Hispaniolana</i> )  | ( <i>Hispaniolana</i> ) | <i>Hispaniolana</i>    |
| ( <i>Lissembryon</i> )   | –                       | <i>Lissembryon</i>     |
| <i>Zachrysia</i>         | <i>Zachrysia</i>        | <i>Zachrysia</i>       |
|                          |                         | Gonostomopsinae        |
|                          |                         | <i>Gonostomopsis</i> * |
|                          |                         | Polygyridae            |
|                          |                         | Solaropsinae           |
| <i>Solaropsis</i>        | <i>Solaropsis</i>       | <i>Solaropsis</i>      |

Dashes (–) indicate a taxon that was not treated in a particular classification.

\*Movement such that the linear order could not be preserved.

convergence has also played a role. Wurtz (1955a) noted multiple shared anatomical characters among species of *Caracolus*, *Labyrinthus s.l.* and *Pleurodonte s.l.* (e.g. size of ovotestis, origin of free retractors, apical angle of lung and ureter) and Cuzzo (2003) reported that *Caracolus* and *Labyrinthus s.l.* exhibited similarity in morphology of alveoli and phallic sheath. *Caracolus*, *Labyrinthus* and *Lucerna* also share discoidal, keeled shells. They were all previously placed in the Pleurodontinae, but our study places them in three different families.

Homoplasy in shell characters due to ecological adaptations is well documented in gastropods (e.g. Australian camaenids: Criscione & Köhler, 2013; Köhler & Criscione, 2015; *Placostylus* in New Caledonia: Dowle *et al.*, 2015 and hydrobioids in New Zealand: Haase, 2008). Homoplasy in anatomical characters has been reported so often in helicoids that Neiber, Razkin & Hausdorf (2017) suggest that parallel evolution in genital characters is a rule rather

than an exception. Extensive homoplasy of some characters and rapid divergent evolution of others have confounded the systematics of Pleurodontidae and of helicoids generally. This may explain why our results differ substantially from those of Cuzzo (2003), who produced the only prior phylogenetic analysis of the New World helicoids, based on shell morphology and internal anatomy. She recognized Pleurodontinae for *Pleurodonte* (containing *Pleurodonte s.s.*, *Dentellaria* and *Lucerna*) and Caracolinae for *Eurycratera* (including *Thelidomus*), *Polydotes* (including *Granodomus*, *Lissembryon*, *Luquillia* and *Parthena*), *Zachrysia*, *Caracolus*, *Solaropsis*, *Isomeria* and *Labyrinthus*. Our analyses did recover the core group that Cuzzo placed in Caracolinae, but exclude the basal (*Eurycratera*) and crown groups (*Labyrinthus* and *Isomeria*) of her phylogenetic tree. Cuzzo (2003) did not include sagdids, or small-bodied helicoids such as Thysanophoridae and Hygromiidae in her analysis, and some of the shell characters coded in her matrix can be variable within

species (e.g. whether the umbilicus is open or not), or intergrade so as not to be consistently scorable (e.g. general shape of aperture). We also found that some characters for *Zachrysia* were scored erroneously. For example, character 25 (flagellum) was scored as 'long straight, thin, even' when *Zachrysia* actually has a thick flagellum (Pilsbry, 1929). Furthermore, some of the outgroups were scored with the common state of characters, rather than as polymorphic (e.g. Helicidae), so the entire matrix needs to be re-evaluated before it can be re-analyzed to understand if there is genuine conflict between molecules and morphology.

The clade containing Sagdidae is the sister group of Helicoidea, so we rank it as superfamily Sagdoidea. In addition to Sagdidae, Sagdoidea contains Solaropsidae Nordsieck, 1986, including subfamily Caracolinae (transferred from Pleurodontidae), and Zachrysiidae Robinson, Sei & Rosenberg, new family (diagnosed below). Sagdidae includes Polydontinae (transferred from Pleurodontidae) and Platysuccineinae. These are all Neotropical taxa: Sagdidae has centre of diversity in Jamaica, with 56 endemic species there, and is restricted to the Caribbean Basin and neighbouring areas (Florida, Bahamas, Bermuda); Caracolinae and Polydontinae are native to the Greater Antilles, but not Jamaica; Zachrysiidae is native to Cuba and Solaropsinae is restricted to South America. The phylogeny implies that Sagdoidea have been present continuously in the Greater Antilles since the early Eocene or early Oligocene (Fig. 4 and Table 7, Node B, 51.8 Ma, PCI: 40.5–64.2 Ma and Node C, 43.3 Ma, PCI: 32.6–54.6 Ma). It thus joins Urocoptidae, another group of land snails, as one of the oldest elements of the Caribbean biota (Uit de Weerd *et al.*, 2016).

The clade containing *Pleurodonte* does not group with Sagdoidea, but with Helicoidea, sister to Helminthoglyptidae. Even the restricted Pleurodontinae recognized by Schileyko (2006) proves to be polyphyletic, with *Caracolus* grouping with Sagdoidea and *Labyrinthus* and *Isomeria* basal to most other families in Helicoidea, separate from Jamaican and Lesser Antillean Pleurodontinae, which are the only remaining members of Pleurodontidae. We propose Labyrinthidae Borrero, Sei, Robinson & Rosenberg, new family (diagnosed below), for *Labyrinthus* and *Isomeria*. Labyrinthidae is sister to Cepolidae in our calibrated phylogeny (Fig. 4), but Cepolidae is the basal clade of Helicoidea in our ML and Bayesian trees (Figs 2, 3). The phylogenetic analysis of Old World helicoids by Razkin *et al.* (2015: fig. 3) also found Cepolidae as the basal clade in Helicoidea. Their investigation included several other New World taxa, but none of those here classified in Sagdoidea.

The relaxed molecular clock analysis dates the divergence of the Helicoidea and Sagdoidea between late

Cretaceous and middle Paleocene (PCI: 61.2–95.7 Ma, Node A in Fig. 4). Helicoidea diversified in the New World around 64.9 Ma (PCI: 54.0–77.3 Ma, Node E) and colonized the Old World between 46.5 and 64.4 Ma (Node F). All three analyses show a single colonization of the Old World, but this is strongly supported only in the Bayesian analysis. The alternate scenario is two colonizations of the Old World. The main difference between these scenarios is placement of Polygyridae: trees showing one colonization have Polygyridae nested in Bradybaenidae/Camaenidae, indicating that it recolonized the New World, whereas trees with two colonizations have Polygyridae basal, indicating a New World origin.

We found a substantially younger age for the origin of Helicoidea than did Razkin *et al.* (2015), who estimated 107 Ma (PCI: 82.7–138.0). This is likely due to their inclusion of a Jurassic (150 Ma) calibration point for the origin of Stylommatophora, although there is no fossil evidence to support this age, which resulted in Helicoidea being more than twice as old as any of the fossils they used to calibrate helicoid families. Jörger *et al.* (2010) estimated the divergence of Orthurethra and Stylommatophora (which includes Helicoidea) at about 80 Ma, and Neiber *et al.* (2017) suggests Razkin *et al.*'s (2015) age of Helicoidea may be an overestimation. Razkin *et al.*'s (2015) fossil calibrations are compatible with nodes in our tree, for example Helicidae (33.9 Ma) and Helicodontidae (28.1 Ma) vs. 38.7–55.8 Ma PCI for divergence of Sphincterochilidae, Helicodontidae and Helicidae (Node G). Moreover, it is difficult to judge if some of the fossils used in Razkin *et al.* (2015) are genuinely members of the families they are attributed to, for example, *Loganiopharynx* (Hygromiidae) and *Dentellocaracolus* (Sphincterochilidae) (see discussion of fossils below). Another problem with the calibrated phylogeny in Razkin *et al.* (2015) is that it contains taxa not included in their main analyses (Pleurodontidae, Cepolidae, Monadeniidae and Polygyridae) and their calibrated and uncalibrated analyses recovered different clades among taxa that were included (e.g. Sphincterochilidae + Elonidae and Helicidae + Trissexodontidae; fig. 2 vs. fig. 3).

Sagdoidea occupies the Caribbean Basin and northern to central South America, while Helicoidea is distributed in all continents except Antarctica. Sagdoidea is much less species rich than Helicoidea, with about 200 species, vs. about 4700 [tallied from Richardson (1980, 1982, 1983, 1984, 1985, 1986), with genera placed in the superfamilies used herein; see Rosenberg (2014); Table 7]. Despite low species richness, however, the magnitude of morphological disparity in Sagdoidea is similar to that in Helicoidea (Table 9; Fig. 5); for example, the range of shell widths in Sagdoidea entirely encompasses the range of widths

**Table 9.** Comparison of morphological disparity of Helicoidea and Sagdoidea

| Feature             | Helicoidea                    |            | Sagdoidea   |                                    |
|---------------------|-------------------------------|------------|-------------|------------------------------------|
| Maximum height (mm) | <i>Helicostyla woodiana</i>   | <b>79</b>  | 52          | <i>Hispaniolana gigantea</i>       |
| Minimum height (mm) | <i>Atenia quadrasi</i>        | 2.4        | <b>1.5</b>  | <i>Vilitas omissa</i>              |
| Maximum width (mm)  | <i>Lysinoe ghiesbreghti</i>   | <b>75</b>  | 85          | <i>Solaropsis gibboni</i>          |
| Minimum width (mm)  | <i>Ripkeniella petrophila</i> | 3.5        | <b>2.6</b>  | <i>Trifaux triodon</i>             |
| Maximum whorls      | <i>Buliminidius hirsutus</i>  | <b>13</b>  | 11          | <i>Sagda</i> cf. <i>S. grandis</i> |
| Minimum whorls      | <i>Metostracon mima</i>       | <1         | 2.5         | <i>Coloniconcha prima</i>          |
| Maximum H/W         | <i>Buliminidius hirsutus</i>  | <b>3.9</b> | 1.1         | <i>Sagda</i> cf. <i>S. grandis</i> |
| Minimum H/W         | <i>Polygyra septemvolva</i>   | 0.25       | <b>0.24</b> | <i>Polygyratia polygyrata</i>      |

The species with the greatest or least measure for each given feature for each superfamily is shown. The more extreme value is shown in bold for each comparison, with five favouring Helicoidea and three favouring Sagdoidea. The minimum width for sagdids is not certain; Schileyko (2006) classifies *Trifaux* as a polygyrid, but we consider it a sagdid as no polygyrids are native to Jamaica; on the other hand, Schileyko (1998) classified *Xenodiscula* as a sagdid (height 0.55, width 1.6 mm), but noted that it might be a zonitoid. The smallest width of an undoubted sagdid is 3.1 mm, for *Vilitas omissa*. The minimum height width ratio for sagdoids is also uncertain. Schileyko (2006) placed *Polygyratia* in Solaropsinae, but its systematic position is controversial (see Cuzzo, 2003). If *Polygyratia* proves not to be a sagdoid, then *Corneosagda ptychodes* is the next flattest species, with H/W = 0.35, and six of the comparisons favor Helicoidea. The figured specimens are exemplars of the species, except for *Sagda* cf. *S. grandis*, which is the actual specimen with greatest number of whorls and greatest H/W ratio known thus far in the Sagdoidea

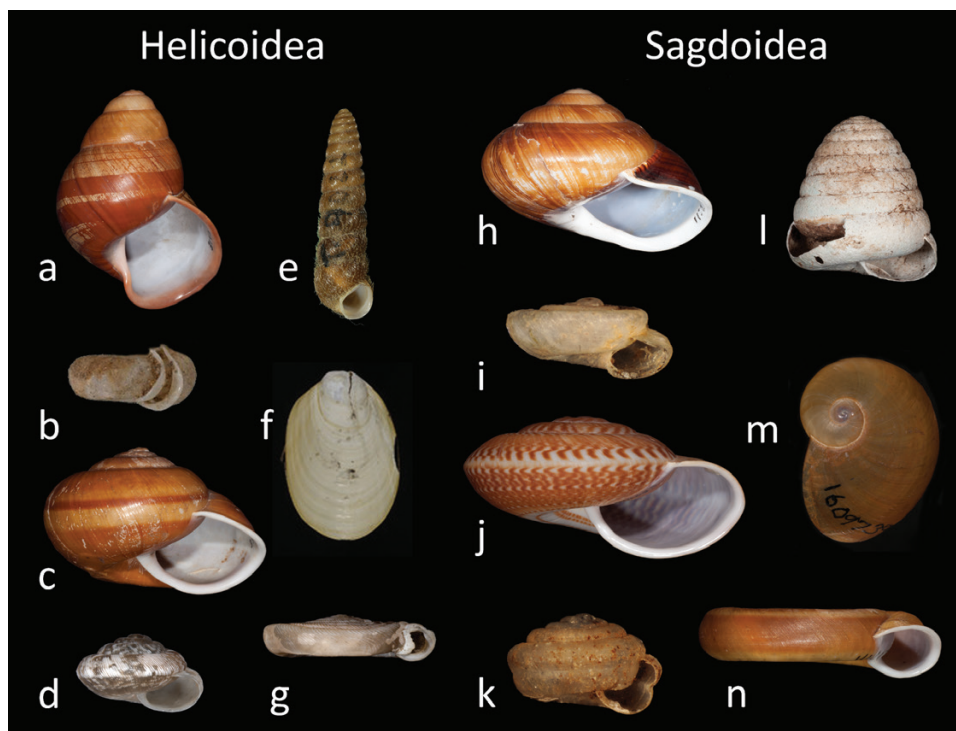

**Figure 5.** Comparison of morphological disparity of Helicoidea (a–g) and Sagdoidea (h–n) presented in Table 9. Taxa shown: (a) *Helicostyla woodiana* (ANSP 3142), (b) *Atenia quadrasi* (HNC 41159), (c) *Lysinoe ghiesbreghti* (ANSP 33555), (d) *Ripkeniella petrophila* (RMNH.MOL.57268), (e) *Buliminidius hirsutus* (SMF-9022), (f) *Metostracon mima* (ANSP 77245), (g) *Polygyra septemvolva* (ANSP 149810), (h) *Hispaniolana gigantea* (ANSP 1132), (i) *Vilitas omissa* (ANSP 5612), (j) *Solaropsis gibboni* (ANSP 411023), (k) *Trifaux triodon* (ANSP 163915), (l) *Sagda* cf. *S. grandis* (ANSP 139396), (m) *Coloniconcha prima* (ANSP 160973), (n) *Polygyratia polygyrata* (ANSP 217111).

in Helicoidea. Both groups have semislugs, and species with periostracal hairs, apertural barriers, axial ribs and shell shapes ranging from discoid to globose to pyramidal, evidently due to convergent evolution.

#### ORIGIN AND COMPOSITION OF PLEURODONTIDAE

Our phylogenetic analyses show that the four Jamaican genera form a monophyletic group, sister to pleurodontids from the Lesser Antilles. All other



supposed pleurodontids grouped with Sagdidae, or, in the case of *Labyrinthus* and *Isomeria*, did not group with either Pleurodontidae or Sagdidae. Our analyses did not determine the biogeographic origin of Jamaican Pleurodontidae despite inclusion of many potential outgroups. All three analyses recovered *Plesarionta stearnsiana*, a helminthoglyptid from California, as a sister taxon to the pleurodontids, although strong support was found only with the Bayesian analysis. Razkin *et al.* (2015: fig. 3) found Pleurodontidae (represented by *Dentellaria* and *Thelidomus*) sister to a clade containing Humboldtianidae and Monadeniidae, with those three families sister to the clade containing Helicidae. Their analysis did not contain Helminthoglyptidae; whereas ours did not contain Humboldtianidae or Monadeniidae, but the latter two families are often ranked as subfamilies of Helminthoglyptidae, and all of them were included in Superfamily Xanthonychoidea by Schileyko (2006). All of the 'xanthonychoid' families were represented in Sei *et al.*'s (2014) preliminary phylogeny, and Xanthonychidae, Helminthoglyptidae, Monadeniidae, Humboldtianidae, Epiphragmophoridae and Pleurodontidae formed a well-supported clade. *Trichodiscina coactiliata* (Férussac, 1839), a xanthonychid that inhabits central Mexico to northern South America, was found to share the most recent common ancestor with Pleurodontidae. Future research should seek the sister group of Pleurodontidae among the members of that group, namely Xanthonychidae, Monadeniidae, Helminthoglyptidae and Epiphragmophoridae.

There is no strong evidence for the occurrence of Pleurodontidae outside the Caribbean Basin. The conchological characteristics of helicoid fossil species described by Dall (1890) and Mansfield (1937) from Florida agree with polygyrids or cepolids, as shown in Results. Nordsieck (2014) reclassified *Pleurodonte norica* Binder, 2004 from the Lower Miocene of Austria as a *Galactochilus* and *Pleurodonte michalkovaci* Binder & Harzhauser in Harzhauser, Gross & Binder (2008) from the Middle Miocene of Austria as a *Pseudochloritis*. Nordsieck (2014) placed both *Galactochilus* and *Pseudochloritis* in Elonidae (Helicoidea). Kadolsky, Binder & Neubauer (2016) showed that *Galactochilus* had been misapplied to European species and suggested that *Pl. norica* might belong to their new genus *Agalactochilus* which they placed in Helicidae. When Cockerell (1914) described *Pleurodonte eohippina* (Paleocene, Wyoming), he suggested an affinity to *Labyrinthus* (which we exclude from Pleurodontidae). Russell (1931) doubted Cockerell's (1914) original generic assignment and noted that its morphology was within the range of *Polygyra* or *Ashmunella*, whereas Hartman & Roth (1998) classified it in Helicinidae. Thus, difficulty in delineating Pleurodontidae within

Helicoidea (e.g. Richardson, 1985), in addition to over-reliance on general shell shape without close attention to detailed character states, have muddled fossil classifications and cladistics of Pleurodontidae and other helicoids as well.

Pleurodontids colonized Jamaica approximately 16.7 Ma (PCI: 15.0–18.4 Ma) and Sagdidae colonized in a similar time frame (14.7 Ma, PCI: 12.8–16.5 Ma). Both of these molecular clock estimates are consistent with geological estimates for the emergence of Jamaica at 14–15 Ma (Mitchell, 2008; James-Williamson, Mitchell & Ramsook, 2014). Both Jamaican pleurodontids and sagdids have varied shell morphologies (Fig. 3), ranging from low-spined, sharply keeled to globose, and, in Sagdidae, pyramidal. The pleurodontid radiation is consistent with a single colonization of Jamaica. This colonization resulted in more than 30 endemic species, with an array of morphologies suggestive of adaptive radiation. However, there has been only one study of Jamaican taxa aimed at detecting adaptive trait variation: Goodfriend (1987) found a strong positive correlation between mean shell diameter and mean annual rainfall.

The Jamaican taxa usually classified as *Pleurodonte* did not group with *Pleurodonte s.s.* from the Lesser Antilles and are reclassified here as *Dentellaria* and *Lucerna*, which were considered subgenera of *Pleurodonte* by Baker (1935). We resurrect the subfamily Lucerninae Swainson, 1840; it contains *Lucerna*, *Dentellaria*, *Thelidomus* and *Eurycratera*, all of which are endemic to Jamaica (see Taxonomic Actions below). The subfamily Pleurodontinae is restricted to the Lesser Antilles. Gonostomopsinae Schileyko, 2006 is a synonym of Pleurodontinae, as *Gonostomopsis* grouped within *Pleurodonte* in the Bayesian and ML analyses. We did not have material of the monotypic subfamily Discolepinae (Schileyko, 2006) to assess whether it belongs in Pleurodontidae. Solem (1959) suggested that *Discolepis* Ancey, 1904, from Martinique, was derived from *Trichodiscina*, which Sei *et al.* (2014) suggested was related to Pleurodontidae.

With the removal of the Lesser Antillean taxa, it becomes easier to delineate morphological patterns among the Jamaican taxa that were historically classified as *Pleurodonte*. *Lucerna* generally have large shells (>35 mm) with either no or one tooth on the outer part of the basal lip and *Dentellaria* have smaller shells (<35 mm) with two teeth on the outer part of the basal lip. The teeth in *Lucerna* are confined to the lip, in *Dentellaria* they extend farther into the aperture, so that external grooves corresponding to at least some of the teeth are visible basally. When *Lucerna* are small, they have thicker shells than *Dentellaria* of similar size. Other trends are that *Dentellaria* always have three or four (or rarely five) apertural teeth, whereas



all *Lucerna*, except *Lu. chemnitziana*, have two or fewer. Some *Dentellaria* have the aperture strongly deflected so that the lip edge is raised onto the basal region; this does not occur in *Lucerna*.

Our analyses do not support the monophyly of these genera, but neither do they strongly contradict them, and the taxa that prevent monophyly are the most aberrant morphologically. All three analyses show two clades in *Lucerna*; Clade A is eastern in distribution and Clade B is largely west of A, with *Lu. bainbridgii* of uncertain placement between them. All three analyses show *Dentellaria* monophyletic, except for two taxa of uncertain placement: *D. okeniana* and *D. strangulata*. The former was found to be the sister clade of *Dentellaria* exclusive of *D. strangulata* or basal to *Lucerna* + *Dentellaria*, and the latter was recovered as the sister clade of *Lucerna* Clade B or *Lucerna* Clade B and *Lu. bainbridgii*, but all combinations lacked strong support. *Dentellaria okeniana* is the only *Dentellaria* that has only one outer tooth instead of two, and *D. strangulata* has an extremely constricted aperture, with teeth diverging rather than paralleling each other in the aperture. These could both be put in monotypic genera if further study confirms their position outside *Dentellaria*.

Although *Lucerna* Clade B includes only two currently recognized species (i.e. *L. lucerna* and *L. sublucerna*; Rosenberg & Muratov, 2006), morphological diversity (e.g. size, body whorl profile, basal tooth morphology, soft tissue colour pattern) and up to 21% divergence in *COII* and 14.9% divergence in 16S sequences within this group strongly suggest the presence of numerous overlooked and cryptic species. Identification of these OTUs with nominal taxa will be the subject of a separate paper.

#### VARIATION, ECOTYPES AND IMPLICATIONS FOR FOSSIL CALIBRATIONS

The Jamaican radiations of Pleurodontidae and Sagdidae show that 15 million years is sufficient for radical change in shell form in land snails, with shapes ranging from flattened lenticular to globose (Fig. 3g–m and 3p–s). But morphological change can occur much more rapidly than that. Several recent studies have shown substantial variation of the spire index (length to width ratio) within species of land snails. Uit de Weerd & Velázquez (2017) demonstrated rapid increase in spire height in *Tenuistemma* (Urocoptidae) in Cuba, and *Ainohelix editha* (Bradybaenidae) in Hokkaido, Japan, has forms ranging from flat-spined to globular (index 0.38–0.81, measured from Teshima *et al.*, 2003: fig. 1). Morii *et al.* (2015) suggested that introgressive hybridization between *A. editha* and *Ezohelix gainesi* showed that adaptive morphological

differences were evolving more rapidly than reproductive isolation.

*Rhagada* (Camaenidae) from Rosemary Island, Western Australia has a range of morphologies similar to that seen in *A. editha* (index 0.37–0.80, measured from Stankowski, 2011: fig. 7) and has been presented as a model of ecological speciation (Stankowski, 2013). The full range of morphologies in this *Rhagada* species is represented in a cline of only 200 m, with low-spined forms associated with rocky outcrops, where their shape may help them shelter in crevices. The most dramatic variation within a species was reported by Breure (2008): the type series of *Bostryx multiconspectus* has spire index varying from 0.45 to 1.00, and his figure 4 shows a range up to 1.39 in the material examined.

The distribution of spire indices in land snails is generally thought to have adaptive significance. Cain (1977) showed that the distribution is bimodal with modes around 0.5 and 3, and few species have values around 1. Cain argued that the non-random distribution of values could be explained only by natural selection. He speculated that having length similar to width was less stable in crawling animals. Subsequent research has shown that snails of different spire indices have preferred orientations (horizontal or vertical surfaces) (Cook & Jaffar, 1984), that high- and low-spined shells are more balanced than globose shells (Okajima & Chiba, 2011) and that deflection of the aperture in formation of the adult lip brings the shell into a position more balanced with respect to gravity than in juveniles (Okajima & Chiba, 2013). The typical pleurodontid shape is near the mode of 0.5 that Cain observed for low spined shells, so the frequent convergence on this shell form is not surprising.

Cain's (1977) data show considerable variation in spire index within species (his fig. 2), so there is ample scope for natural selection to act on shell shape in many species. Many authors have demonstrated variation in shell shape in snail species and populations, including Brown (1911) and Goodfriend (1983) for Jamaican pleurodontids, Crampton (1932) for Society Islands partulids and Welch (1938) for Hawaiian achatinellids. In more recent years, some studies of land snails have recognized ecotypes. In *Mandarina* (Bradybaenidae) in the Bonin Islands, there are arboreal, semi-arboreal, exposed ground and sheltered ground ecotypes, with arboreal snails having lower spires than ground dwelling ones, among other differences (Chiba, 2004; Davison & Chiba, 2006). In *Placostylus* (Dowle *et al.*, 2015) in New Caledonia, lower-spined shells with narrower apertures are associated with warmer, drier forests and higher-spined shells with wider apertures with cooler, wetter forests. *Rhagada* (Stankowski, 2013), discussed above, shows repeated evolution of a

flat-spired keeled ecotype in rocky elevated areas from a more globose ecotype in the surrounding plain.

The diversity of ecological associations in these few examples suggests that the shapes in pulmonate land snails overall cannot be explained as a set of ecomorphs as has been done with *Anolis* lizards (Williams, 1983; Losos, 2009), but consistent ecomorphs may yet be identified in subclades within various pulmonate groups. For example, Uit de Weerd *et al.* (2016) found that urocoptid genera group by geographic region rather than nominal subfamily (as we found with pleurodontids) and that independent radiations of urocoptids developed similar suites of forms, including large, bullet-shaped terrestrial forms, slender arboreal forms with reduced peristome, and elongate forms that live on rock faces. More than 100 years ago, Pilsbry (1903) proposed that these represented 'independent local adaptive radiations'.

Under the ecological opportunity hypothesis of adaptive radiation (Schluter, 2000), morphological variation within species should be highest in the initial phases of adaptive radiation, but it should then decrease as it becomes increasingly constrained by interspecific competition as lineages accumulate (Parent & Crespi, 2009). Assigning fossil land snails to modern radiations is thus inherently risky, since the current array of morphologies may not represent the initial array, and convergence is likely in the limited morphospace of snail shells.

The geographical cohesion of subclades observed in the Helicoidea, Sagdoidea and Urocoptoidea, along with the degree of morphological change that can occur over time periods much less than 15 million years, casts doubt on the generic identification of North American pre-Miocene land snail fossils that have been attributed to *Pleurodonte* (Roth, 1984), *Caracolus* (Bishop, 1979), *Zachrysia* and *Labyrinthus* (both in Roth, 1988), which may represent convergent morphologies. Comparison of fossil and extant species becomes inherently more problematic if they are allopatric, since there is no potential for stratigraphic continuity. However, excluding calibration points based on these fossils from our analysis did not substantially change the molecular clock estimates.

Sauquet *et al.* (2012) noted three methods employed in assessing the relationships of fossils used in calibrations: intuitive, apomorphy-based and phylogenetic. The phylogenetic method is not feasible with land snails: since features of soft anatomy rarely fossilize, fossil snail taxa cannot readily be included in a phylogenetic analysis with recent ones. The apomorphy-based method is also problematic, as few uniquely apomorphic characters of the shell have ever been defined in land snails. Although the phylogenetic and apomorphy-based approaches are not feasible for the fossil taxa considered herein, there are approaches beyond the merely intuitive that can be employed. One

is combinations of characters: Roth (1988) in assigning his new Eocene taxon to *Zachrysia* described a set of characters shared with *Zachrysia*, including layers of the shell structure, so his classification was not intuitive, but argued as well as the available data could support. Even now, we do not reject the placement in *Zachrysia*, but point out that it is biogeographically unlikely. Another consideration in choosing fossils for calibrations is to prefer fossils within the current geographic range of the relevant clade, and to consider the effect on the analysis of excluding extralimital fossils.

#### TAXONOMIC ACTIONS AND CONCLUSIONS

Pleurodontidae is restricted to genera *Pleurodonte*, *Dentellaria*, *Lucerna*, *Eurycratera* and *Thelidomus*. The genus *Pleurodonte* as traditionally recognized is paraphyletic. It is here restricted to the Lesser Antilles. Schileyko (2006) had already raised *Dentellaria* to a full genus which we confirm; we here remove *Lucerna* from the synonymy of *Pleurodonte* and recognize it as a full genus endemic to Jamaica.

We found that the type species of *Lucerna*, *Carocola acutissima* Lamarck, 1822, is an older name for *Helix ingens* C. B. Adams, 1850, based on the photographed type in Mermod (1951: 706). When he introduced the name *acutissima*, Lamarck did not state that it was a replacement name for *Helix acuta* Lamarck, 1816 (non Müller, 1774), which was included in its synonymy. Similarly, *H. acuta* Lamarck, 1816 was included in synonymy of *Helix lamarckii* Férussac, 1821, also without statement that it was preoccupied. We designate the specimen illustrated by Mermod as the lectotype of *H. acuta* Lamarck, 1816, *H. lamarckii* Férussac, 1821 and *C. acutissima* Lamarck, 1822, rendering them objective synonyms. The correct name for the taxon is *Lucerna lamarckii* (Férussac, 1821).

We synonymize *Gonostomopsis* with *Pleurodonte*, since it grouped within *Pleurodonte* in the Bayesian and ML analyses. In that topology, maintaining it as a distinct genus would require transferring all the included *Pleurodonte* species to *Gonostomopsis*, except the type species, *Pl. lychnuchus*, which is basal. This also results in *Gonostomopsinae* being synonymized with *Pleurodontinae*. If further analysis including more of the Lesser Antillean species shows a need to subdivide *Pleurodonte*, the name *Gonostomopsis* should not be resurrected. It is an unnecessary replacement name for *Chrysodon* Ancey, 1887 (non Oken 1815) – Oken's work is not available, having been rejected in ICZN Opinion 417.

Under ICZN Article 23.9, we declare Pleurodontidae Ihering, 1912 to be a nomen protectum and use it as the valid name for the family, giving it precedence over its senior synonym Lucernidae Swainson, 1840. We also

declare Pleurodentinae a nomen protectum in relation to the senior homonym Pleurodentinae [Conrath, 1887](#) (Bivalvia), which is a nomen oblitum. The following 26 works have used Pleurodentinae or Pleurodontidae as valid for the gastropod clade since 1977: [Bertrand \(2001\)](#), [Borrero \(2012\)](#), [Borrero & Araujo \(2012\)](#), [Bouchet et al. \(2005\)](#), [Breure \(2010\)](#), [Breure et al. \(2016\)](#), [Capinera \(2012, 2013\)](#), [Ciomperlik et al. \(2013\)](#), [Coan & Petit \(2011\)](#), [Cuezzo \(2003\)](#), [Hugall & Stanisic \(2011\)](#), [Johnson et al. \(2004\)](#), [Mulieri & Mello-Patiu \(2013\)](#), [Nekola \(2014\)](#), [Razkin et al. \(2015\)](#), [Robinson et al. \(2009\)](#), [Rosenberg & Muratov \(2006\)](#), [Roth \(2001\)](#), [Salvador & Simone \(2015\)](#), [Schileyko \(2006\)](#), [Smith & Silagyi \(2009\)](#), [Takeda \(1980\)](#), [Takeda & Tsuruoka \(1979\)](#), [Tang & Tang \(1977\)](#) and [Willig et al. \(2013\)](#); additional works could be cited. We have found no evidence that Lucernidae or Lucerninae [Swainson, 1840](#) or Pleurodentinae [Conrath, 1887](#) has been used as valid since 1899.

DESCRIPTION OF LABYRINTHIDAE BORRERO, SEI,  
ROBINSON & ROSENBERG, NEW FAMILY

urn:lsid:zoobank.org:act:25A32F13-DF56-42FD-8A38-2B81F1E38915

Type genus: *Labyrinthus* Beck, 1837

The shell is discoidal, ranging from 10 to 60 mm in width in *Labyrinthus*, and 18 to 75 mm in *Isomeria* ([Cuezzo, 2006](#)). An umbilicus is always present in juveniles, but ranges among species from fully open to closed in adults. Most species have conspicuous apertural barriers in the form of denticles and lamella of various levels of development. In general, *Labyrinthus* species have more complex apertural barriers on the palatal and parietal areas, with more numerous and/or larger teeth and lamella than those of *Isomeria*, and the shells tend to be less inflated, including some lentiform taxa.

Feeding apparatus has been described for only a few species. The central radular tooth is moncuspid and the lateral and marginal teeth are mono- or bicuspid. The jaw is simple, with either low irregular longitudinal ribs, or weak concentric striations.

The only unique morphological synapomorphies for the family are those reproductive characters noted by [Cuezzo \(2003, 2006\)](#) as shared by *Labyrinthus* and *Isomeria*: the presence of denticles in the interior walls of the vagina in addition to those in the phallus, and the free oviduct branching at an angle with the vagina rather than being continuous with it.

The close relationship between *Labyrinthus* and *Isomeria* is supported by conchological, anatomical and molecular data, yet this clade does not group with pleurodontids or sagdoids, but rather branches basally

in Helicoidea. The grouping with *Caracolus* and *Solaropsis* found by [Cuezzo \(2003\)](#) is not supported, so we recognize this clade at the family level.

The name Lampadiidae [Winckworth, 1945](#), based on *Lampadion* Röding, 1798 previously has been considered available for this clade ([Bouchet et al., 2005](#)), but is a *nomen nudum*, as shown by [Bouchet et al. \(2017\)](#). Rather than validating Winckworth's name, we have named the taxon Labyrinthidae, for two reasons: (1) *Lampadion* is not a name in current use, although it is regarded as a senior synonym of *Labyrinthus* Beck, 1837 by a few authors (e.g., [Rehder, 1967](#); [Abbott, 1989](#)). [Wurtz \(1955b\)](#) designated a lectotype for *Lampadion* that rendered it a *nomen dubium*, but [Rehder \(1967\)](#) disputed the validity of this action. As the situation is unresolved, we prefer to base the family name on the well-known genus *Labyrinthus* and (2) [Schileyko \(2006\)](#) introduced the family-group name Lampadiini as a tribe in Helicidae, based on *Lampadia* Albers, 1854. To avoid homonymy with this name, we would need to choose a different stem than the one used by Winckworth to introduce a name based on *Lampadion* (ICZN Article 29.6). Labyrinthidae has been used in Pisces but is not available as it is not based on genus name (ICZN Article 11.7.1); it is not recognized in van der Laan, Eschmeyer & Fricke's (2014) list of family-group names of fish.

Labyrinthidae includes 60–70 species of Neotropical mainland distribution, mostly in northwestern South America, but extending east to French Guyana and northeastern Brazil, and north into southern Central America (Panama and Costa Rica). To the south, its distribution extends into Peru, and includes mostly Andean regions, with some Amazonian habitats. Highest species diversity is in western Colombia, Ecuador and northern Peru.

DESCRIPTION OF ZACHRYSIIDAE ROBINSON, SEI &  
ROSENBERG, NEW FAMILY

urn:lsid:zoobank.org:act:FC1250C0-D6D6-41B8-A062-F08F64D9A26B

Type genus: *Zachrysia* Pilsbry, 1894

The shell is solid and thick, 16–70 mm in width ([Schileyko, 2006](#)), generally globose but depressed, and somewhat eccentrically and unevenly coiled. The protoconch consists of one and half whorls that are polished and shiny, with faint microscopic spiral lines. The teleoconch consists of four to four and a half whorls, and can be sharply and finely ribbed to almost smooth in sculpture. There may be a microsculpture of closely crowded granules, sometimes arranged in irregular spiral striae. The oblique aperture is downturned at maturity, with a thickened, reflexed



lip and the baso-columellar margin expanded with a slight tooth. The shell colour can be pale yellow to orange. Adults are not umbilicate, while juveniles are minutely so.

The reproductive anatomy of the Zachrysiidae is unique, quite distinct from all other taxa previously included in the Pleurodontidae and New World Camaenidae. The right ommatophoral retractor muscle does not pass between the phallus and the oviduct, but rather to the left of the genitalia. The phallus is thick, lacks a verge, but the phallus chamber contains one to two fleshy structures (in most species), referred to as 'stimulus' (Pilsbry, 1929; Cuzzo, 2003) or stimulators (Schileyko, 2006), but whose functions are debatable and may differ in different species. The epiphallus is very short (in some species barely discernible). There is a thick flagellum that may be short or long, but does not taper but ends rather bluntly, plus there is (in most species) what Pilsbry (1929) called an accessory flagellum and what Schileyko (2006) called the penial caecum, attached separately to the phallus; again, its function is unknown. The gametolytic gland duct is coiled around the phallus retractor muscle, is separate from the oviduct throughout its length, that is, not coiled together, nor running down to the phallic-oviducal angle, all characteristics unknown in other helicoids. The gametolytic gland duct is short, swollen basally and the gametolytic gland reservoir relatively large. The ovotestis or gonad is made up of very elongated acini, and there is no vagina, again characters that differ with those of other Pleurodontidae.

The Zachrysiidae consists of some 14 known species included in a single genus *Zachrysia* with several subgenera, all native to Cuba. Three species have been introduced outside of Cuba: two are established in Florida, and two have spread to several islands in the West Indies, the Yucatan Peninsula of Mexico and Panama. Outside of their native range, *Zachrysia* species are serious horticultural pests (Fields & Robinson, 2004).

Cuzzo (2003) placed *Zachrysia* in Caracolinae, with several genera that we here place in Pleurodontidae s.s. (*Eurycratera*), Sagdidae (*Polydontes*) and Labyrinthidae (*Labyrinthus* and *Isomeria*). Our ML and Bayesian phylogenies do show Zachrysiidae as sister to the remaining taxa that Cuzzo placed in Caracolinae (*Caracolus* and *Solaropsis*) but this is weakly supported (Figs 2, 3).

#### ACKNOWLEDGEMENTS

We thank Natalie Blake of the University of the West Indies at Mona, Jamaica, who as a graduate student generated some of the DNA sequences reported here (Blake, 2007). We offered her co-authorship on a much

earlier draft of this manuscript in 2013, but have not been able to contact her since then. We also thank Francisco Borrero (USDA) for providing a first draft of the description of Labyrinthidae on short notice, Amanda Lawless for laboratory work, Igor Muratov for fieldwork, Judy Goldberg for sorting samples, and John Slapcinsky (UF) and Elizabeth Shea (Delaware Museum of Natural History) for loan of specimens. The image of *Buliminidius hirsutus* was provided by Sigrid Hof and Ronald Janssen (Naturmuseum Senckenberg), the image of *Ripkeniella petrophila* was provided by Jeroen Goud (Naturalis Biodiversity Center) and the image of *Atenia quadrasi* was provided by Francisco Welter Schultes (Johann-Friedrich-Blumenbach Institute for Zoology and Anthropology, University of Göttingen). Discussions with Richard Goldberg brought us invaluable insights into the identity of members of the *L. lucerna* species complex. John Allen, Philippe Bouchet, Frank Köhler and two anonymous reviewers provided helpful comments to improve this manuscript. This work was supported by a grant from the Laboratory for Molecular Systematics and Ecology at ANSP funded by I. Wistar Morris, III and by Arcadia University Faculty Development Fund to MS.

#### REFERENCES

- Abbott RT.** 1989. *Compendium of landshells*. Burlington: American Malacologists.
- Akaike H.** 1974. A new look at the statistical model identification. *IEEE Transactions on Automatic Control* **19**: 716–723.
- Alroy J.** 2000. New methods for quantifying macroevolutionary patterns and processes. *Paleobiology* **26**: 707–733.
- Aubry MP.** 1993. Calcareous nannofossil stratigraphy of the Neogene formations of eastern Jamaica. *Geological Society of America Memoir* **182**: 131–178.
- Baker HB.** 1935. Jamaican land snails, 6. *Nautilus* **49**: 52–58.
- Bertrand A.** 2001. Notes sur les mollusques terrestres de Saint-Martin (Petites Antilles). *Documents Malacologiques* **2**: 35–37.
- Binder H.** 2004. Terrestrial, freshwater and brachyhaline Gastropoda from the Lower Miocene deposits of Oberdorf (Styria, Austria). *Annalen des Naturhistorischen Museums in Wien* **105A**: 189–229.
- Bishop MJ.** 1979. A new species of *Caracolus* (Pulmonata: Camaenidae) from the Oligocene of Nebraska and the biotic history of the American camaenid land snails. *Zoological Journal of the Linnean Society* **67**: 269–284.
- Blake N.** 2007. *Diversity and systematics of selected Jamaican land snails*. Unpublished D. Phil. thesis, University of the West Indies.
- Borrero FJ.** 2012. A re-examination of the pleurodontid land snails from the Sierra Nevada de Santa Marta region, Colombia, with the description of a new species of *Isomeria* Albers (Gastropoda Pulmonata: Stylommatophora):

- Pleurodontidae). *Archiv für Molluskenkunde* **141**: 217–231.
- Borrero FJ, Araujo R. 2012.** Clarification of the taxonomic status of *Isomeria morula* (Hidalgo, 1879), from Ecuador (Gastropoda: Pleurodontidae). *Journal of Conchology* **41**: 145–152.
- Bouchet P, Rocroi J-P, Frýda J, Hausdorf B, Ponder W, Valdés Á, Warén A. 2005.** Classification and nomenclator of gastropod families. *Malacologia* **47**: 1–397.
- Bouchet P, Rocroi J-P, Hausdorf B, Kaim A, Kano Y, Nützel A, Parkhaev P, Schrödl M, Strong E. 2017.** Revised classification, nomenclator and typification of gastropod and monoplacophoran families. *Malacologia* **61** [in press].
- Breure ASH. 2008.** Carination strikes the eye: extreme shell shapes and sibling species in three Andean genera of the Orthalicidae (Gastropoda, Stylommatophora). *Zoologische Mededelingen* **82**: 499–514.
- Breure ASH. 2010.** The rediscovery of a semi-slug: *Coloniconecha prima* Pilsbry, 1933 (Gastropoda, Pleurodontidae) from Hispaniola. *Basteria* **74**: 78–86.
- Breure ASH, Hovestadt A, Fields A, Robinson DG. 2016.** The land Mollusca (Gastropoda) of Saint Kitts and Nevis (Lesser Antilles), with description of a new species. *Nautilus* **130**: 27–52.
- Brown AP. 1911.** Variation in some Jamaican species of *Pleurodonte*. *Proceedings of the Academy of Natural Sciences of Philadelphia* **63**: 117–164.
- Burbrink FT, Ruane S, Pyron RA. 2012.** When are adaptive radiations replicated in areas? Ecological opportunity and unexceptional diversification in West Indian dipsadine snakes (Colubridae: Alsophiini). *Journal of Biogeography* **39**: 465–475.
- Buskirk RE. 1985.** Zoogeographic patterns and tectonic history of Jamaica and the northern Caribbean. *Journal of Biogeography* **12**: 445–461.
- Cahuzac B, Janssen AW. 2010.** Eocene to Miocene holoplanktonic Mollusca (Gastropoda) of the Aquitaine Basin, southwest France. *Scripta Geologica* **141**: 1–193.
- Cain AJ. 1977.** Variation in the spire index of some coiled gastropod shells, and its evolutionary significance. *Philosophical Transactions of the Royal Society of London, Series B* **277**: 377–428.
- Capinera JL. 2012.** Culture of terrestrial slugs and snails (Gastropoda): acceptance and suitability of synthetic insect diets. *Florida Entomologist* **95**: 1077–1085.
- Capinera JL. 2013.** Cuban brown snail, *Zachrysis provisoria* (Gastropoda): damage potential and control. *Crop Protection* **52**: 57–63.
- Chiba S. 2004.** Ecological and morphological patterns in communities of land snails of the genus *Mandarina* from the Bonin Islands. *Journal of Evolutionary Biology* **17**: 131–143.
- Ciomperlik MA, Robinson DG, Gibbs IH, Fields A, Stevens T, Taylor BM. 2013.** Mortality to the giant African snail, *Lissachatina fulica* (Gastropoda: Achatinidae), and non-target snails using select molluscicides. *Florida Entomologist* **96**: 370–379.
- Coan EV, Petit RE. 2011.** The publications and malacological taxa of William Wood (1774–1857). *Malacologia* **54**: 1–76.
- Cockerell TDA. 1914.** Gastropod Mollusca from the Tertiary strata of the West. *Bulletin of the American Museum of Natural History* **33**: 115–120.
- Comer JB, Naeser CW, McDowell FW. 1980.** Fission-track ages of zircon from Jamaican bauxite and terra rossa. *Economic Geology* **75**: 117–121.
- Conrath P. 1887.** Über einige silurische Pelecypoden. *Sitzungsberichte der Kaiserlichen Akademie der Wissenschaften. Mathematisch-Naturwissenschaftliche Classe. Abt. 1, Mineralogie, Botanik, Zoologie, Geologie und Paläontologie* **96**: 40–50, pls. 1–2.
- Cook LM, Jaffar WN. 1984.** Spire index and preferred surface orientation in some land snails. *Biological Journal of the Linnean Society* **21**: 307–313.
- Crampton HE. 1932.** Studies on the variation, distribution, and evolution of the genus *Partula*. The species inhabiting Moorea. *Carnegie Institute of Washington Publication* **410**: 1–335.
- Criscione F, Köhler F. 2013.** Conserved shell disguises diversity in *Mesodontrachia* landsnails from the Australian Monsoon Tropics (Gastropoda: Camaenidae). *Zoologica Scripta* **42**: 389–405.
- Cuezzo MG. 2003.** Phylogenetic analysis of the Camaenidae (Mollusca: Stylommatophora) with special emphasis on the American taxa. *Zoological Journal of the Linnean Society* **138**: 449–476.
- Cuezzo MG. 2006.** On a new species of *Isomeria* Beck and redescription of species of *Labyrinthus* Beck from South America (Gastropoda: Stylommatophora: Camaenidae). *Zootaxa* **1221**: 1–23.
- Dall WH. 1890.** Contributions to the Tertiary fauna of Florida. *Transactions of the Wagner Free Institute of Philadelphia* **3**: 1–200.
- Darriba D, Taboada GL, Doallo R, Posada D. 2012.** jModel-Test 2: more models, new heuristics and parallel computing. *Nature Methods* **9**: 772.
- Davis JL, Stevenson DW, Petersen G, Seberg O, Campbell LM, Freudenstein JV, Goldman DH, Hardy CR, Michelangeli FA, Simmons MP, Specht CD, Vergara-Silva F, Gandolfo M. 2004.** A phylogeny of monocots, as inferred from *rbcL* and *atpA* sequence variation, and a comparison of methods for calculating jackknife and bootstrap values. *Systematic Botany* **29**: 467–510.
- Davison A, Chiba S. 2006.** Labile ecotypes accompany rapid cladogenesis in an adaptive radiation of *Mandarina* (Bradybaenidae) land snails. *Biological Journal of the Linnean Society* **88**: 269–282.
- Donovan S. 2002.** A karst of thousands: Jamaica's limestone scenery. *Geology Today* **18**: 143–151.
- Donovan SK, Paul CRC. 2013.** Late Pleistocene land snails from 'red bed' deposits, Round Hill, south central Jamaica. *Alcheringa* **37**: 273–284.
- Donovan SK, Pickerill RK, Portell RW, Jackson TA, Harper DAT. 2003.** The Miocene palaeobathymetry and palaeoenvironments of Carriacou, the Grenadines, Lesser Antilles. *Lethaia* **36**: 255–272.
- Dowle EJ, Morgan-Richards M, Brescia F, Treweek SA. 2015.** Correlation between shell phenotype and local



- environment suggests a role for natural selection in the evolution of *Placostylus* snails. *Molecular Ecology* **24**: 4205–4221.
- Drummond AJ, Bouckaert RR. 2015.** *Bayesian evolutionary analysis with BEAST*. Cambridge: Cambridge University Press.
- Drummond AJ, Ho SYW, Phillips MJ, Rambaut A. 2006.** Relaxed phylogenetics and dating with confidence. *PLoS Biology* **4**: e88.
- Drummond AJ, Suchard MA, Xie D, Rambaut A. 2012.** Bayesian phylogenetics with BEAUti and the BEAST 1.7. *Molecular Biology and Evolution* **29**: 1969–1973.
- Emberton KC. 1995.** When shells do not tell: 145 million years of evolution in North America's polygyrid land snails, with a revision and conservation priorities. *Malacologia* **37**: 69–110.
- Fields A, Robinson DG. 2004.** The Cuban land snail *Zachrysia*: the emerging awareness of an important snail pest in the Caribbean Basin. Conference Abstract: 70th Annual Meeting of American Malacological Society, Sanibel Island, FL, USA. 30 July–4 August, 2014.
- Golikov AN, Starobogatov YI. 1989.** Problems of phylogeny and system of the prosobranchiate gastropods. *Trudy Zoologicheskogo Instituta* **187**: 4–77 [in Russian].
- Goodfriend GA. 1983.** *Clinal variation and natural selection in the land snail Pleurodonte lucerna in western St. Ann Parish, Jamaica*. PhD dissertation, University of Florida, vi, 204.
- Goodfriend GA. 1987.** Late Holocene morphological changes in a Jamaican land snail: evidence for changes in rainfall. In: Berger WH, Labeyrie LD, eds. *Abrupt climatic change*. Dordrecht: D. Reidel Publishing Company, 123–126.
- Goodfriend GA. 1993.** The fossil record of terrestrial mollusks in Jamaica. *Geological Society of America Memoir* **182**: 353–361.
- Graham A. 2003.** Geohistory models and Cenozoic paleoenvironments of the Caribbean Region. *Systematic Botany* **28**: 378–386.
- Guindon S, Gascuel O. 2003.** A simple, fast, and accurate algorithm to estimate large phylogenies by maximum likelihood. *Systematic Biology* **52**: 696–704.
- Haase M. 2008.** The radiation of hydrobiid gastropods in New Zealand: a revision including the description of new species based on morphology and mtDNA sequence information. *Systematics and Biodiversity* **6**: 99–159.
- Hartman JH, Roth B. 1998.** Late Paleocene and Early Eocene non-marine molluscan faunal change in the Bighorn Basin, northwestern Wyoming and south-central Montana. In: Aubry MP, Lucas SG, Berggren WA, eds. *Late Paleocene and early Eocene climatic and biotic events in the marine and terrestrial records*. New York: Columbia University Press, 323–379.
- Harzhauser M, Gross M, Binder H. 2008.** Biostratigraphy of Middle Miocene (Sarmatian) wetland systems in an Eastern Alpine intramontane basin (Gratkorn Basin, Austria): the terrestrial gastropod approach. *Geologica Carpathica* **59**: 45–58.
- Hedges SB, Couloux A, Vidal N. 2009.** Molecular phylogeny, classification, and biogeography of West Indian racer snakes of the Tribe Alsophiini (Squamata, Dipsadidae, Xenodontinae). *Zootaxa* **2067**: 1–28.
- Hendry M. 1987.** Tectonic and eustatic control on late Cenozoic sedimentation within an active plate boundary zone, west coast margin, Jamaica. *Geological Society of America Bulletin* **99**: 718–728.
- Hirano T, Kameda Y, Kimura K, Chiba S. 2015.** Divergence in the shell morphology of the land snail genus *Aegista* (Pulmonata: Bradybaenidae) under phylogenetic constraints. *Biological Journal of the Linnean Society* **114**: 229–241.
- Huelsenbeck JP, Ronquist F, Hall B. 2001.** MrBayes: Bayesian inference of phylogeny. *Bioinformatics* **17**: 754–755.
- Hugall AF, Moritz C, Moussalli A, Stanisic J. 2002.** Reconciling paleodistribution models and comparative phylogeography in the Wet Tropics rainforest land snail *Gnarosophia bellendenkerensis* (Brazier 1875). *Proceedings of the National Academy of Sciences of the United States of America* **99**: 6112–6117.
- Hugall AF, Stanisic J. 2011.** Beyond the prolegomenon: a molecular phylogeny of the Australian camaenid land snail radiation. *Zoological Journal of the Linnean Society* **161**: 531–572.
- Ihering H. 1912.** Analyse der Süd-Amerikanischen Heliceen. *Journal of the Academy of Natural Sciences of Philadelphia* **15**: 475–500, pls. 41–42.
- Iturralde-Vineta MA, MacPhee RDE. 1999.** Paleogeography of the Caribbean region: implications for Cenozoic biogeography. *Bulletin of the American Museum of Natural History* **238**: 1–95.
- James-Williamson SA, Mitchell SF, Ramsook R. 2014.** Tectono-stratigraphic development of the Coastal Group of south-eastern Jamaica. *Journal of South American Earth Sciences* **50**: 40–47.
- Johnson MS, Hamilton ZR, Murphy CE, MacLeay CA, Roberts B, Kendrick PG. 2004.** Evolutionary genetics of island and mainland species of *Rhagada* (Gastropoda: Pulmonata) in the Pilbara Region, Western Australia. *Australian Journal of Zoology* **52**: 341–355.
- Jörger KM, Stöger I, Kano Y, Fukuda H, Kneblsberger T, Schrödl M. 2010.** On the origin of Acochlidia and other enigmatic euthyneuran gastropods, with implications for the systematics of Heterobranchia. *BMC Evolutionary Biology* **10**: 323.
- Jung P. 1971.** Fossil mollusks from Carriacou, West Indies. *Bulletins of American Paleontology* **61**: 142–262.
- Kadolsky D, Binder H, Neubauer TA. 2016.** Taxonomic review of the fossil land gastropod species hitherto placed in the genus *Galactochilus* Sandberger 1875, with the description of a new genus (Gastropoda: Helicoidea). *Archiv für Molluskenkunde* **145**: 151–188.
- Katoh K, Toh H. 2008.** Recent developments in the MAFFT multiple sequence alignment program. *Briefings in Bioinformatics* **9**: 286–298.
- Köhler F, Criscione F. 2015.** A molecular phylogeny of camaenid land snails from north-western Australia unravels widespread homoplasy in morphological characters (Gastropoda, Helicoidea). *Molecular Phylogenetics and Evolution* **83**: 44–55.
- Kück P, Meusemann K, Dambach J, Thormann B, von Reumont BM, Wägele JW, Misof B. 2010.** Parametric and

- non-parametric masking of randomness in sequence alignments can be improved and leads to better resolved trees. *Frontiers in Zoology* **7**: 10.
- Lanfear R, Calcott B, Ho SYW, Guindon S. 2012.** PartitionFinder: combined selection of partitioning schemes and substitution models for phylogenetic analyses. *Molecular Biology and Evolution* **29**: 1695–1701.
- Larkin MA, Blackshields G, Brown NP, Chenna R, McGettigan PA, McWilliam H, Valentin F, Wallace IM, Wilm A, Lopez R, Thompson JD, Gibson TJ, Higgins DG. 2007.** Clustal W and Clustal X version 2.0. *Bioinformatics* **23**: 2947–2948.
- Losos JB. 2009.** *Lizards in an evolutionary tree: ecology and adaptive radiation of anoles*. Berkeley, CA: University of California Press.
- Lozouet P, Lesport J-F, Renard P. 2001.** Révision des Gastropoda (Mollusca) du stratotype de l'Aquitainien (Miocène inf.): site de Saucats "Lariey", Gironde, France. *Cossmanniana, Hors série* **3**: 1–189.
- Maddison WP, Maddison DR. 2005.** *MacClade. Analysis of phylogeny and character evolution, 4.08*. Sunderland: Sinauer Associates.
- Maddison WP, Maddison DR. 2011.** *Mesquite: a modular system for evolutionary analysis. Version 2.75*. Available at: <http://mesquiteproject.org> last accessed on 3 August 2017.
- Mansfield WC. 1937.** Mollusks of the Tampa and Suwannee Limestones. *Geological Bulletin No. 15, State of Florida Department of Conservation* **15**: 1–334.
- Megirian D, Murray P, Schwartz L, Von Der Borch C. 2004.** Late Oligocene Kangaroo Well local fauna from the Ulta Limestone (new name), and climate of the Miocene oscillation across central Australia. *Australian Journal of Earth Sciences* **51**: 701–741.
- Mermod G. 1951.** Les types de la Collection Lamarck au Muséum de Genève. Mollusques vivants. II. *Revue Suisse de Zoologie* **58**: 693–752.
- Miller MA, Pfeiffer W, Schwartz T. 2010.** Creating the CIPRES Science Gateway for inference of large phylogenetic trees. In: *Proceedings of the Gateway Computing Environments Workshop (GCE)*, New Orleans, LA, USA, 14 November 2010, 1–8.
- Misof B, Misof K. 2009.** A Monte Carlo approach successfully identifies randomness in multiple sequence alignments: a more objective means of data exclusion. *Systematic Biology* **58**: 21–34.
- Mitchell SF. 2008.** Geology, landscape, and fossil mammals. In: Wilson B, ed. *Jamaica: a photographic journey through the land of wood and water*. Jamaica: Eladio Fernández, 13–15.
- Mitchell SF, James-Williamson S, Miller DJ, Mandal A. 2016.** Comment on: "Geomorpho-tectonic evolution of the Jamaican restraining bend" by Leomaris Domínguez-González, Louis Andreani, Klaus P. Stanek and Richard Gloaguen [Geomorphology, 228 (2015) 320–334]. *Geomorphology* **263**: 179–182.
- Morii Y, Yokoyama J, Kawata M, Davison A, Chiba S. 2015.** Evidence of introgressive hybridization between the morphologically divergent land snails *Ainohelix* and *Ezohelix*. *Biological Journal of the Linnean Society* **115**: 77–95.
- Mulieri PR, Mello-Patiu CA. 2013.** Revision of the Neotropical genus *Malacophagomyia* (Diptera: Sarcophagidae) with description of a new species. *Zootaxa* **3736**: 368–378.
- Neiber MT, Razkin O, Hausdorf B. 2017.** Molecular phylogeny and biogeography of the land snail family Hygromiidae (Gastropoda: Helicoidea). *Molecular Phylogenetics and Evolution* **111**: 169–184.
- Nekola JC. 2014.** Overview of the North American terrestrial gastropod fauna. *American Malacological Bulletin* **32**: 225–235.
- Niemi NA, Buscher JT, Spotila JA, House MA, Kelley SA. 2013.** Insights from low-temperature thermochronometry into transpressional deformation and crustal exhumation along the San Andreas fault in the western Transverse Ranges, California. *Tectonics* **32**: 1602–1622.
- Nordsieck H. 1986.** The system of the Stylommatophora (Gastropoda), with special regard to the systematic position of the Clausiliidae, II. Importance of the shell and distribution. *Archiv für Molluskenkunde* **117**: 93–116.
- Nordsieck H. 2014.** Annotated check-list of the genera of fossil land snails (Gastropoda: Stylommatophora) of western and central Europe (Cretaceous – Pliocene), with description of new taxa. *Archiv für Molluskenkunde* **143**: 153–185.
- Okajima R, Chiba S. 2011.** How does life adapt to a gravitational environment? The outline of the terrestrial gastropod shell. *American Naturalist* **178**: 801–809.
- Okajima R, Chiba S. 2013.** Adaptation from restricted geometries: the shell inclination of terrestrial gastropods. *Evolution* **67**: 429–437.
- Palumbi SR, Martin A, Romano S, McMillan W, Stine O, Grabowski G. 1991.** *The Simple Fool's Guide to PCR version 2.0*. Honolulu: University of Hawaii.
- Parent CE, Crespi BJ. 2009.** Ecological opportunity in adaptive radiation of Galápagos endemic land snails. *American Naturalist* **174**: 898–905.
- Park JK, Ó Foighil D. 2000.** Sphaeriid and corbiculid clams represent separate heterodont bivalve radiations into freshwater environments. *Molecular Phylogenetics and Evolution* **14**: 75–88.
- Perez KE, Defreitas N, Slapcinsky J, Minton RL, Anderson FE, Pearce TA. 2014.** Molecular phylogeny, evolution of shell shape, and DNA barcoding in Polygyridae (Gastropoda: Pulmonata), an endemic North American clade of land snails. *American Malacological Bulletin* **32**: p1–31.
- Pilsbry HA. 1894.** Genus *Pleurodonte* Fischer de Waldheim. *Manual of Conchology* **9**: 84–100.
- Pilsbry HA. 1895.** Guide to the study of helices. *Manual of Conchology* **9**: vii–xlvi.
- Pilsbry HA. 1904.** Family Urocoptidae Pils. & Van. *Manual of Conchology* **15**: vii–xl.
- Pilsbry HA. 1929.** Studies on West Indian mollusks: the genus *Zachrysia*. *Proceedings of the Academy of Natural Sciences of Philadelphia* **80**: 581–606.
- Prothero DR. 1996.** Magnetostratigraphy of the Eocene-Oligocene transition in Trans-Pecos Texas. In: Prothero DR, Emry RJ, eds. *The terrestrial Eocene-Oligocene transition in North America*. Cambridge: Cambridge University Press, 189–198.

- Prothero DR, Emry RJ. 2004.** The Chadronian, Orellan, and Whitneyan North American land mammal ages. In: Woodburne MO, ed. *Late Cretaceous and Cenozoic mammals of North America*. New York, NY: Columbia University Press, 156–168.
- Rambaut A. 2009.** *FigTree: tree figure drawing tool, version 1.3.1*. Available at: <http://tree.bio.ed.ac.uk/>
- Razkin O, Gómez-Moliner BJ, Prieto CE, Martínez-Ortí A, Arrébola JR, Muñoz B, Chueca LJ, Madeira MJ. 2015.** Molecular phylogeny of the western Palaearctic Helicoidea (Gastropoda, Stylommatophora). *Molecular Phylogenetics and Evolution* **83**: 99–117.
- Rehder HA. 1967.** Valid zoological names of the Portland Catalogue. *Proceedings of the United States National Museum* **121**: 1–51.
- Richardson CL. 1980.** Helicidae: catalog of species. *Tryonia* **3**: iii, 697.
- Richardson CL. 1982.** Helminthoglyptidae: catalog of species. *Tryonia* **6**: ii + 117.
- Richardson CL. 1983.** Bradybaenidae: catalog of species. *Tryonia* **9**: ii + 253.
- Richardson CL. 1984.** Oreohelicidae: catalog of species. *Tryonia* **10**: i + 30.
- Richardson CL. 1985.** Camaenidae: catalog of species. *Tryonia* **12**: ii + 479.
- Richardson CL. 1986.** Polygyracea: catalog of species (parts 1, Polygyridae; 2, Corillidae; 3, Sagdidae). *Tryonia* **13**: i + 1–139, 1–40, 1–38.
- Ricklefs R, Birmingham E. 2008.** The West Indies as a laboratory of biogeography and evolution. *Philosophical Transactions of the Royal Society B: Biological Sciences* **363**: 2393–2413.
- Robinson E. 1971.** Observations on the geology of Jamaican bauxite. *Journal of the Geological Society of Jamaica Bauxite/Alumina Symposium, Special Issue*: 3–9.
- Robinson DG, Hovestadt A, Fields A, Breure ASH. 2009.** The land Mollusca of Dominica (Lesser Antilles), with notes on some enigmatic or rare species. *Zoologische Mededelingen* **83**: 615–650.
- Ronquist F, Huelsenbeck JP. 2003.** MRBAYES 3: Bayesian phylogenetic inference under mixed models. *Bioinformatics* **19**: 1572–1574.
- Rosenberg G. 2014.** A new critical estimate of named species-level diversity of the recent Mollusca. *American Malacological Bulletin* **32**: 308–322.
- Rosenberg G, Muratov IV. 2006.** Status report on the terrestrial Mollusca of Jamaica. *Proceedings of the Academy of Natural Sciences of Philadelphia* **155**: 117–161.
- Roth B. 1984.** *Lysinoe* (Gastropoda: Pulmonata) and other land snails from Eocene-Oligocene of Trans-Pecos Texas, and their paleoclimatic significance. *Veliger* **27**: 200–218.
- Roth B. 1988.** Camaenid land snails (Gastropoda: Pulmonata) from the Eocene of Southern California and their bearing on the history of American Camaenidae. *Transactions of the San Diego Society of Natural History* **21**: 203–220.
- Roth B. 2001.** Phylogeny of the pneumostomal area of morphology in terrestrial Pulmonata (Gastropoda). *Nautilus* **115**: 140–146.
- Russel LS. 1931.** Early Tertiary Mollusca from Wyoming: contribution from the William Berryman Scott Research Fund, Princeton University, Issue 64. *Bulletins of American Paleontology* **18**: p1–38.
- Salvador RBS, Simone LRL. 2015.** Taxonomical study on a sample of land snails from Alcobaca (Bahia, Brazil), with description of a new species. *Stuttgarter Beiträge zur Naturkunde A, Neue Serie* **8**: 1–7.
- Sauquet H, Ho SYW, Gandolfo MA, Jordan GJ, Wilf P, Cantrill DJ, Bayly MJ, Bromham L, Brown GK, Carpenter RJ, Lee DM, Murphy DJ, Sniderman JM, Udovicic F. 2012.** Testing the impact of calibration on molecular divergence times using a fossil-rich group: the case of *Nothofagus* (Fagales). *Systematic Biology* **61**: 289–313.
- Schileyko AA. 1998.** Treatise on recent terrestrial pulmonate mollusks, Part 2. Gastrocoptidae, Hypselostomatidae, Vertiginidae, Truncatellinidae, Pachnodidae, Enidae, Sagdidae. *Ruthenica, Supplement 2*: 129–261.
- Schileyko AA. 2000.** Treatise on recent terrestrial pulmonate mollusks, Part 6. Rhytididae, Chlamydephoridae, Systrophiiidae, Haplotrematidae, Streptaxidae, Spiraxidae, Oleacinidae, Testacellidae. *Ruthenica, Supplement 2*: 731–880.
- Schileyko AA. 2003.** Treatise on recent terrestrial pulmonate mollusks, Part 11. Trigonochlamydidae, Papillodermidae, Vitrinidae, Limacidae, Bielziidae, Agriolimacidae, Boettgerillidae, Camaenidae. *Ruthenica, Supplement 2*: 1467–1626.
- Schileyko AA. 2004.** Treatise on recent terrestrial pulmonate mollusks, Part 12. Bradybaenidae, Monadeniidae, Xanthonychidae, Haplotrematidae, Streptaxidae, Spiraxidae, Oleacinidae, Testacellidae. *Ruthenica, Supplement 2*: 1627–1763.
- Schileyko AA. 2005.** Treatise on recent terrestrial pulmonate mollusks, Part 14. Helicodontidae, Ciliellidae, Hygromiidae. *Ruthenica, Supplement 2*: 1907–2048.
- Schileyko AA. 2006.** Treatise on recent terrestrial pulmonate mollusks, Part 13. Helicidae, Pleurodontidae, Polygyridae, Ammonitellidae, Oreohelicidae, Thysanophoridae. *Ruthenica, Supplement 2*: 1765–1906.
- Schluter D. 2000.** *The ecology of adaptive radiation*. Oxford Series in Ecology and Evolution. Oxford: Oxford University Press.
- Schwartz LRS. 2006.** A new species of bandicoot from the Oligocene of northern Australia and implications of bandicoots for correlating Australian Tertiary mammal fauna. *Palaentology* **49**: 991–998.
- Scott B. 1996.** Phylogenetic relationships of the Camaenidae (Pulmonata: Stylommatophora: Helicoidea). *Journal of Molluscan Studies* **62**: 65–73.
- Scott TM, Campbell KM, Rupert FR, Arthur JA, Missimer TM, Lloyd JM, Yon JW, Duncan JG. 2001.** Geologic map of the State of Florida. *Florida Geological Survey Map Series* **146**.
- Sei M, Rosenberg G, Köhler F, Teasdale L, Moussalli A. 2014.** Phylogenetics and evolution of Pleurodontidae and Sagdidae: Jamaica and beyond. Conference Abstract: Mollusca 2014, Mexico City, Mexico, 22–27 June, 2014.
- Smith TR, Silagyi AJ. 2009.** Crushed vehicles, an unusual pathway for the introduction of *Granodomus lima* (Pulmonata: Pleurodontidae) and other exotic terrestrial snails. *Florida Scientist* **72**: 22–27.



- Solem A. 1959.** Notes on Mexican mollusks. II. *Occasional Papers of the Museum of Zoology, University of Michigan* **611**: 1–15.
- Stamatakis A. 2006.** RAxML-VI-HPC: maximum likelihood-based phylogenetic analyses with thousands of taxa and mixed models. *Bioinformatics* **22**: 2688–2690.
- Stankowski S. 2011.** Extreme, continuous variation in an island snail: local diversification and association of shell form with the current environment. *Biological Journal of the Linnean Society* **104**: 756–769.
- Stankowski S. 2013.** Ecological speciation in an island snail: evidence for the parallel evolution of a novel ecotype and maintenance by ecologically dependent postzygotic isolation. *Molecular Ecology* **22**: 2726–2741.
- Stankowski S. 2015.** Layers of contingency shroud pervasive ecological divergence in a local radiation of land snails. *Biological Journal of the Linnean Society* **116**: 267–276.
- Steineck PL. 1974.** Foraminiferal paleoecology of the Montpelier and lower coastal groups (Eocene-Miocene), Jamaica, West Indies. *Palaeogeography, Palaeoclimatology, Palaeoecology* **16**: 217–242.
- Swainson W. 1840.** *A treatise on malacology, or shells and shell-fish*. London: Longman, Orme, Brown, Green, & Longmans and John Taylor.
- Swofford DL. 2002.** *PAUP\*. Phylogenetic analysis using parsimony and other methods, Version 4.0b10*. Sunderland: Sinauer Associates.
- Takeda N. 1980.** Hormonal control of head-wart development in the snail, *Euhadra peliomphala*. *Journal of Embryology and Experimental Morphology* **60**: 57–69.
- Takeda N, Tsuruoka H. 1979.** A sex pheromone secreting gland in the terrestrial snail, *Euhadra peliomphala*. *Journal of Experimental Zoology* **207**: 17–25.
- Tang Z, Tang C. 1977.** The biology and epidemiology of *Eurytrema coelomaticum* (Giard & Billet, 1892) and *Eurytrema pancreaticum* (Janson, 1889) in cattle and sheep in China. *Acta Zoologica Sinica* **23**: 267–282.
- Teasdale LC, Köhler F, Murray KD, O'Hara T, Moussalli A. 2016.** Identification and qualification of 500 nuclear, single-copy, orthologous genes for the Eupulmonata (Gastropoda) using transcriptome sequencing and exon capture. *Molecular Ecology Resources* **16**: 1107–1123.
- Teshima H, Davison A, Kuwahara Y, Yokoyama J, Chiba S, Fukuda T, Ogimura H, Kawata M. 2003.** The evolution of extreme shell shape variation in the land snail *Ainohelix editha*: a phylogeny and hybrid zone analysis. *Molecular Ecology* **12**: 1869–1878.
- Tillier S. 1989.** Comparative morphology, phylogeny and classification of land snails and slugs (Gastropoda: Pulmonata: Stylommatophora). *Malacologia* **30**: 1–303.
- Triantis KA, Rigal F, Parent CE, Cameron RAD, Lenzner B, Parmakelis A, Yeung NW, Alonso MR, Ibáñez M, de Frias Martins AM, Teixeira DNF, Griffiths OL, Yanes Y, Hayes KA, Preece RC, Cowie RH. 2016.** Discordance between morphological and taxonomic diversity: land snails of oceanic archipelagos. *Journal of Biogeography* **43**: 2050–2061.
- Uit de Weerd DR. 2008.** Delimitation and phylogenetics of the diverse land-snail family Urocoptidae (Gastropoda: Pulmonata) based on 28S rRNA sequence data: a reunion with *Cerion*. *Journal of Molluscan Studies* **74**: 317–329.
- Uit de Weerd DR, Robinson DG, Rosenberg G. 2016.** Evolutionary and biogeographical history of the land snail family Urocoptidae (Gastropoda: Pulmonata) across the Caribbean region. *Journal of Biogeography* **43**: 763–777.
- Uit de Weerd DR, Velázquez AF. 2017.** Pinning down *Tenuistemma* (Pulmonata: Urocoptidae): local evolution of an extreme shell type. *Biological Journal of the Linnean Society* **121**: 741–752.
- van der Laan R., Eschmeyer WN, Fricke R. 2014.** Family-group names of recent fishes. *Zootaxa* **3882**: 1–230.
- Wade CM, Hudelot C, Davison A, Naggs F, Mordan PB. 2007.** Molecular phylogeny of the helicoid land snails (Pulmonata: Stylommatophora: Helicoidea), with special emphasis on the Camaenidae. *Journal of Molluscan Studies* **73**: 411–415.
- Wade CM, Mordan PB, Clarke BC. 2001.** A phylogeny of the land snails (Gastropoda: Pulmonata). *Proceedings of the Royal Society of London: Biological Sciences* **268**: 413–422.
- Wade CM, Mordan PB, Naggs F. 2006.** Evolutionary relationships among the Pulmonata land snails and slugs (Pulmonata: Stylommatophora). *Biological Journal of the Linnean Society* **87**: 593–610.
- Walsh SL, Prothero DR, Lundquist DJ. 1996.** Stratigraphy and paleomagnetism of the Middle Eocene Friars Formation and Poway Group, southwestern San Diego County, California. In: Prothero DR, Emry RJ, eds. *The terrestrial Eocene-Oligocene transition in North America*. Cambridge: Cambridge University Press, 120–154.
- Welch DA. 1938.** Distribution and variation of *Achatinella mustelina* Mighels in the Waianae Mountains, Oahu. *Bernice P. Bishop Museum Bulletin* **152**: 1–164, 13 pls.
- Williams EE. 1983.** Ecomorphs, faunas, island size, and diverse end points in island radiations of *Anolis*. In: Huey RB, Pianka ER, Schoener TW, eds. *Lizard ecology: studies of a model organism*. Cambridge, MA: Harvard University Press, 326–370.
- Willig MR, Presley SJ, Bloch CP, Alvarez J. 2013.** Population, community, and metacommunity dynamics of terrestrial gastropods in the Luquillo Mountains: a gradient perspective. *Ecological Bulletins* **54**: 117–140.
- Wilm A, Mainz I, Steger G. 2006.** An enhanced RNA alignment benchmark for sequence alignment programs. *Algorithms for Molecular Biology* **1**: 19.
- Winckworth R. 1945.** The types of the Boltenian genera. *Proceedings of the Malacological Society of London* **26**: 136–148.
- Wurtz CB. 1955a.** The American Camaenidae. *Proceedings of the Academy of Natural Sciences of Philadelphia* **107**: 99–143, 19 pls.
- Wurtz CB. 1955b.** *Labyrinthus* Beck vs. *Lampadion* Röding. *Nautilus* **68**: 106–107.
- Zilch A. 1960.** Gastropoda: Euthyneura. *Handbuch der Paläozoologie* **6**: 401–834.
- Zwickl DJ, Hillis DM. 2002.** Increased taxon sampling greatly reduces phylogenetic error. *Systematic Biology* **51**: 588–598.
